# Supplementary material for: USP35 mitigates endoplasmic reticulum stress‐induced apoptosis by stabilizing RRBP1 in non‐small cell lung cancer
Source: PubMed Central journal article supplement (PMC8978513; doi:10.1002/1878-0261.13112), 2021-10-18
Supplement: MOL2-16-1572-s001.pdf [file MOL2-16-1572-s001.pdf]

Supplementary materials

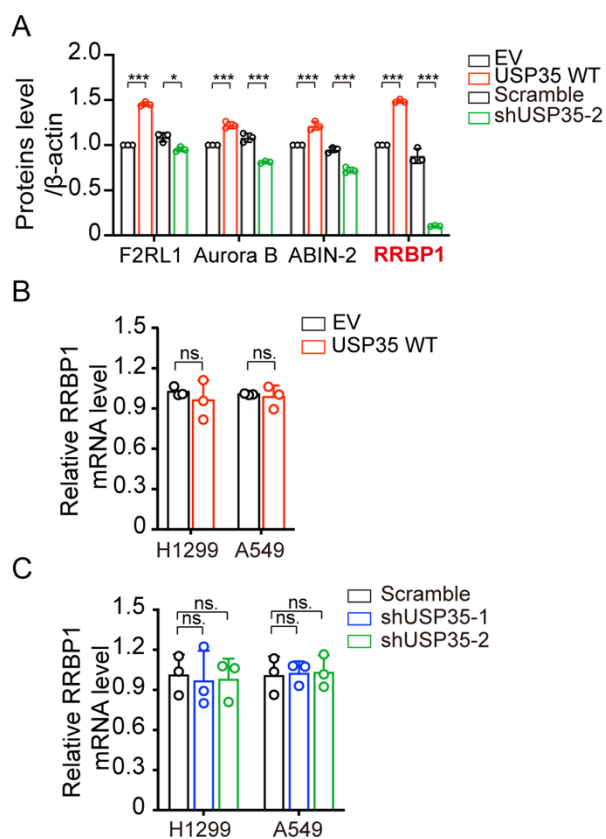

**Fig. S1. USP35 enhances RRBP1 expression at posttranscriptional level.**

(A) Quantitative analysis of the indicated DEPs was confirmed by western blot. (B) Expression of RRBP1 was detected by qRT-PCR in USP35 overexpression (USP35 WT) H1299 and A549 cells. (C) Expression of *RRBP1* was detected by qRT-PCR in shRNAs mediated USP35 knockdown H1299 and A549 cells. All data are presented by mean  $\pm$  SD. \* $P < 0.05$ , \*\*\* $P < 0.001$  based on the Student *t*-test. All results are representatives of three independent experiments.

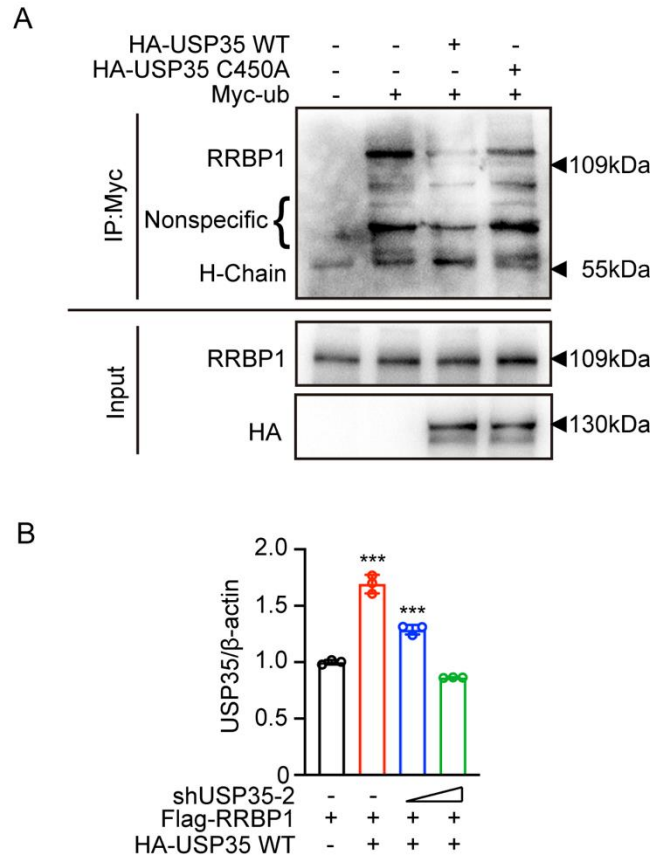

**Fig. S2. USP35 decreases ubiquitination of RRBP1.**

(A) H1299 cells were transfected or co-transfected with Myc-Ub alone or along with HA-USP35 WT or HA-USP35 C450A. Cell lysates were immunoprecipitated with anti-Myc antibody, followed by immunoblotting with an anti-RRBP1 antibody. The results are representatives of three independent experiments. (B) Quantitative analyses of USP35 protein detected by western blot in the indicated PC9 cells transfected or co-transfected with Flag-RRBP1 alone or along with HA-USP35 WT or in combination with HA-USP35 WT and 2  $\mu$ g or 4  $\mu$ g shUSP35-2. All data are presented by mean  $\pm$ SD. \*\*\* $P < 0.001$  based on the Student  $t$ -test.

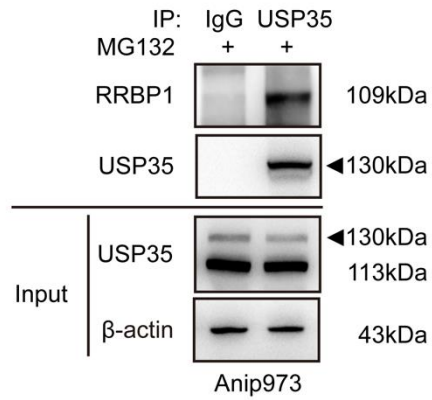

**Fig. S3. USP35 interacts with RRBP1.**

Cell lysates of Anip973 were immunoprecipitated with anti-USP35 antibody or IgG antibody, followed by immunoblotting with anti-RRBP1 antibody. The results are representatives of three independent experiments.

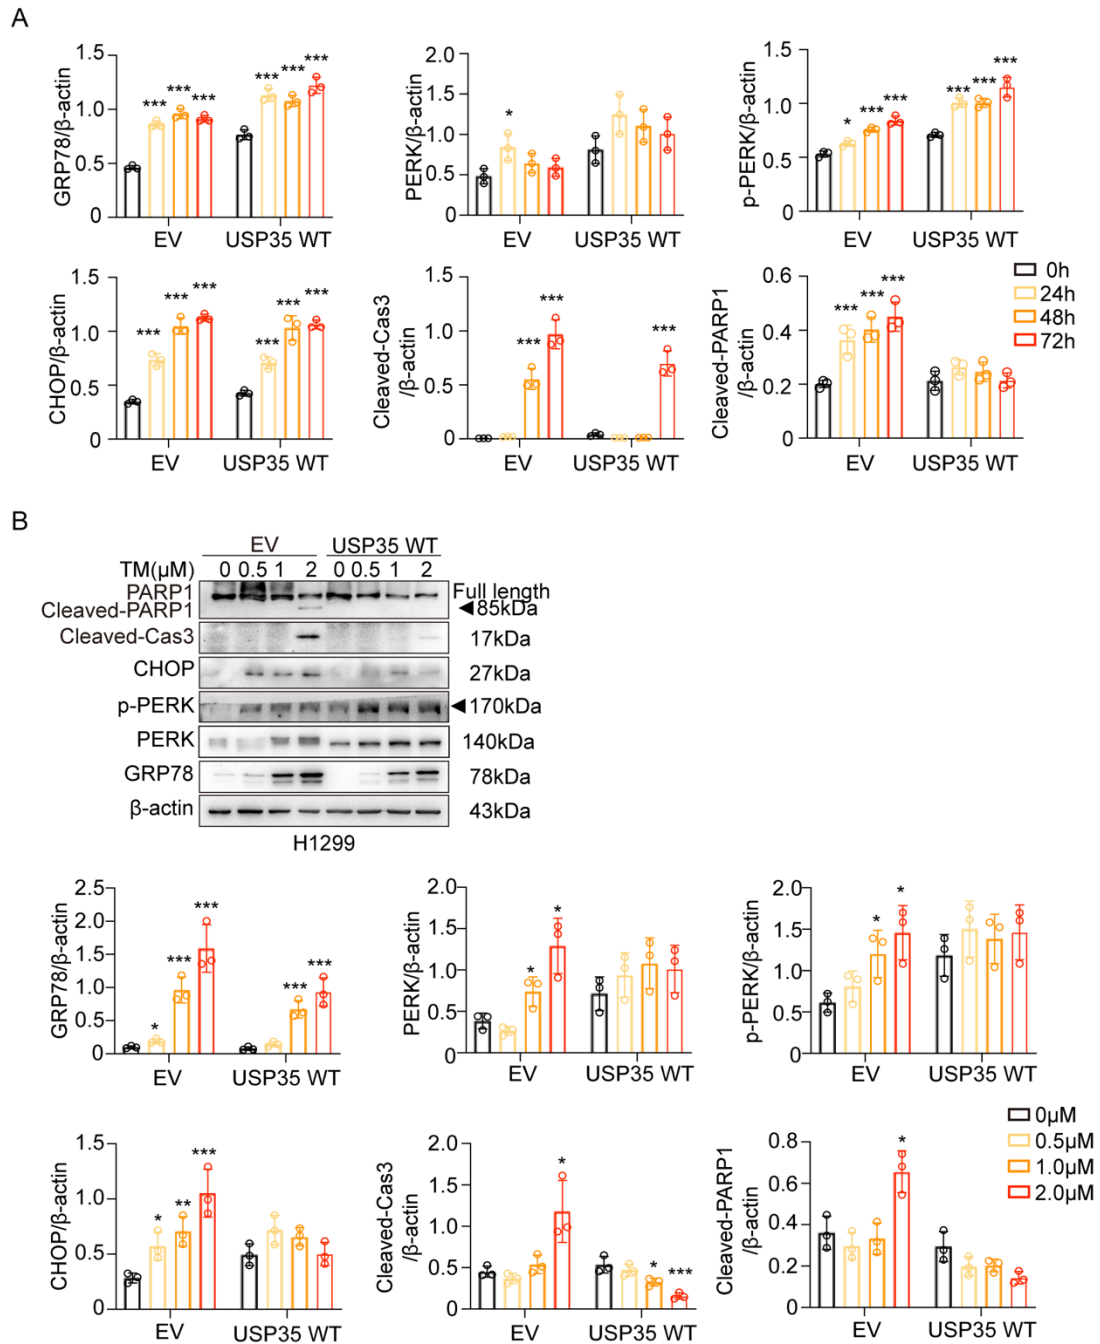

**Fig. S4. USP35 overexpression alleviates ER stress induced cell apoptosis.**

(A) Quantitative analyses of the indicated proteins detected by western blot in H1299 cells with stable overexpression of USP35 (USP35 WT) and their control (EV) cells treated with 2  $\mu$ M TM for 0 h, 24 h, 48 h and 72 h. (B) H1299 cells with stable overexpression of USP35 (USP35 WT) and their control (EV) cells were treated with 0  $\mu$ M, 0.5  $\mu$ M, 1  $\mu$ M and 2  $\mu$ M TM for 48 h. The indicated proteins were detected by western blot. Quantitative analyses were shown in the graphs.



All data are presented by mean  $\pm$ SD. \* $P < 0.05$ , \*\*\* $P < 0.001$  based on the Student  $t$ -test. All results are representatives of three independent experiments.

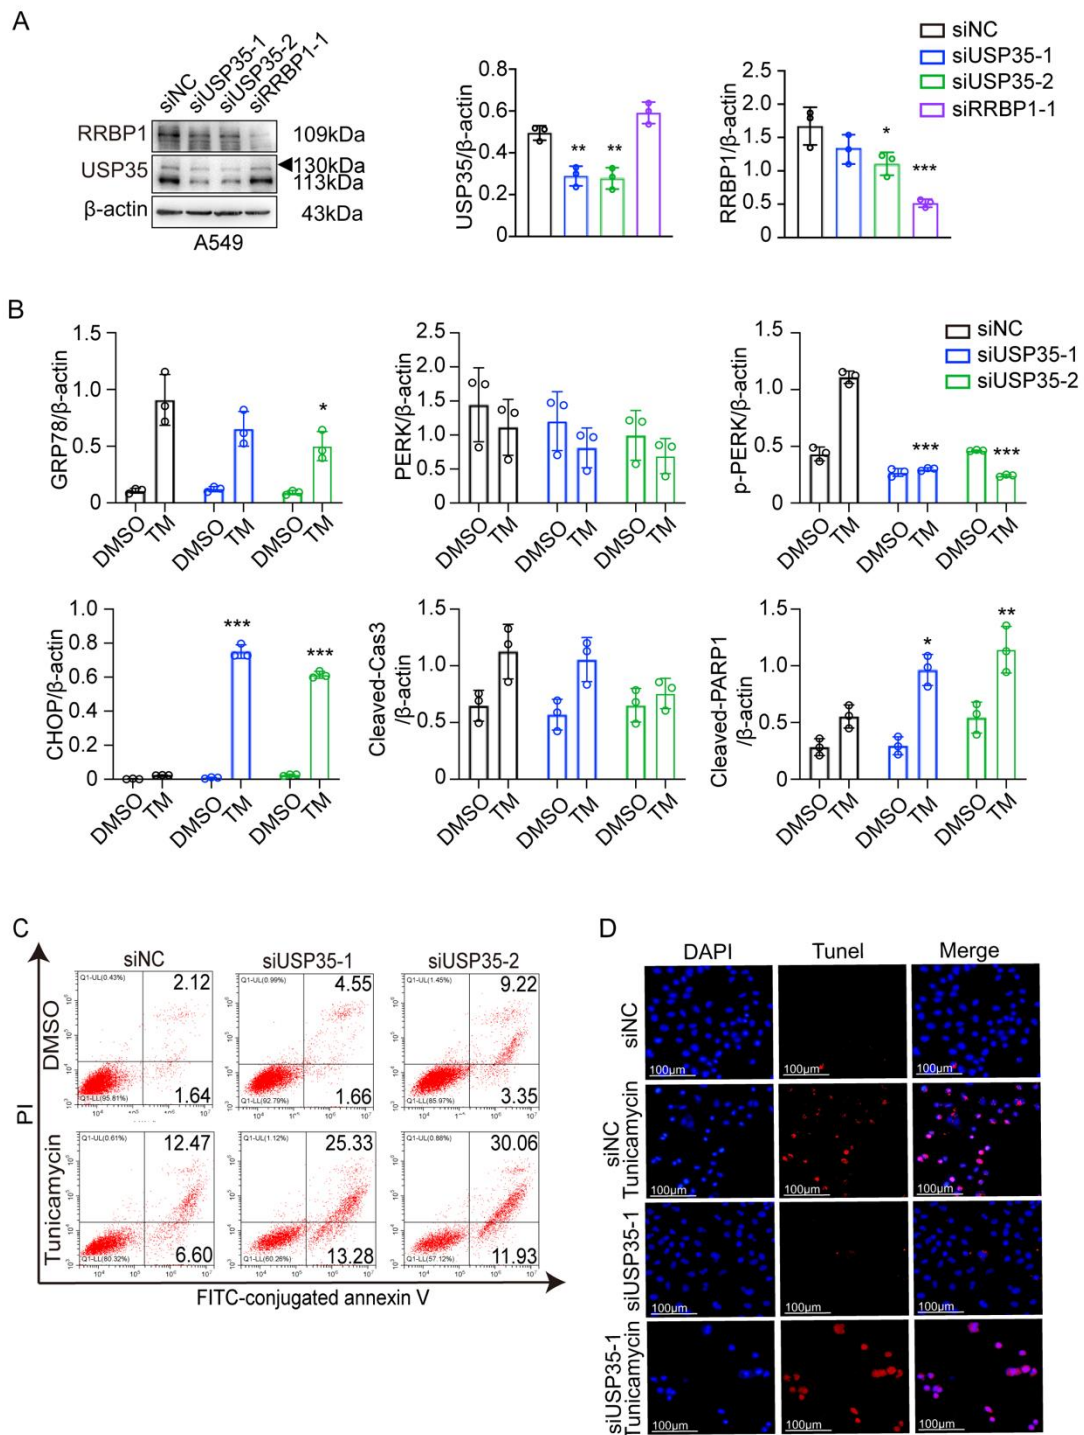

**Fig. S5. USP35 knockdown exacerbates ER stress induced cell apoptosis.**

(A) The knockdown efficiency of siRNAs specifically targeting USP35 or RRBP1 was verified by western blot in A549 cells. Quantitative analyses were shown in the graphs. (B) Quantitative analyses were presented for the indicated proteins detected

by western blot in A549 cells transfected with USP35 specific siRNAs (siUSP35-1 and siUSP35-2) and scramble siRNA (siNC) treated with or without 2  $\mu$ M TM for 48 h. (C) SiUSP35-1, siUSP35-2 and siNC A549 cells were treated with or without 2  $\mu$ M TM for 48 h. The cells were subsequently stained with Annexin V-FITC and propidium iodide (PI) and analyzed by flow cytometry. (D) SiUSP35-1 and siNC A549 cells were treated with or without 2  $\mu$ M TM for 48 h. The apoptotic cells were detected using TUNEL staining. Scale bars indicate 100  $\mu$ m (D). All data are presented by mean  $\pm$ SD. \* $P$ <0.05, \*\* $P$ <0.01, \*\*\* $P$ <0.001 based on the Student  $t$ -test. All results are representatives of three independent experiments.

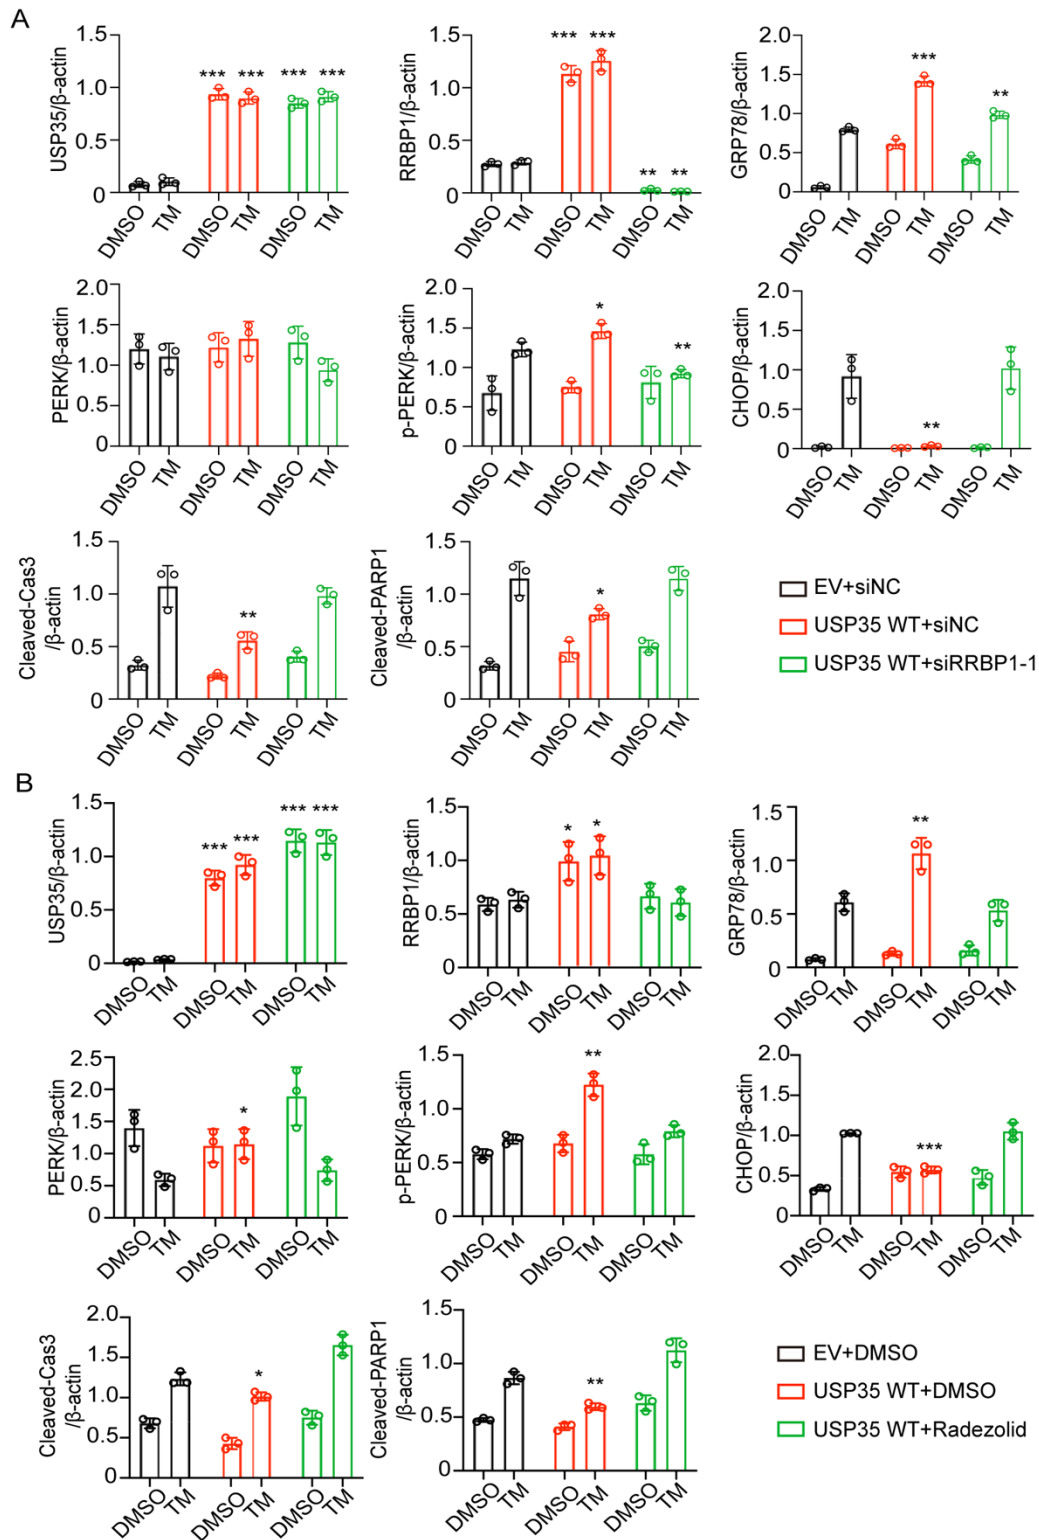

**Fig. S6. RRBP1 is responsible for the inhibitory effect of USP35 on Tunicamycin (TM)-induced cell apoptosis.**

(A and B) Quantitative analyses were presented for the indicated proteins detected by western blot in the indicated H1299 cells treated with or without 2  $\mu$ M TM (A) or in

combination with Radezolid (B) for 48h. All data are presented by mean  $\pm$  SD.

\* $P < 0.05$ , \*\* $P < 0.01$ , \*\*\* $P < 0.001$  based on the Student *t*-test.

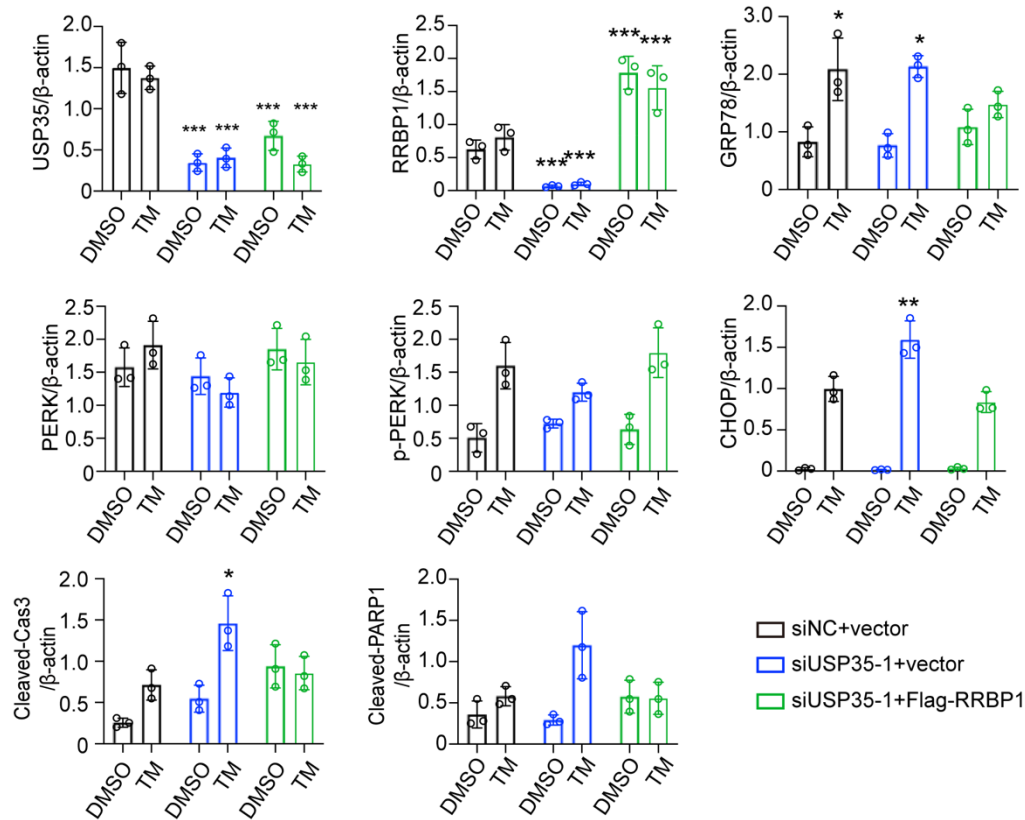

**Fig.S7. RRBP1 overexpression inhibits the promotive effect of USP35 silencing on Tunicamycin (TM)-induced cell apoptosis.**

Quantitative analyses were shown for the indicated proteins detected by western blot in the indicated A549 cells treated with or without 2  $\mu$ M TM for 48 h. All data are presented by mean  $\pm$  SD. \* $P$ <0.05, \*\* $P$ <0.01, \*\*\* $P$ <0.001 based on the Student  $t$ -test.

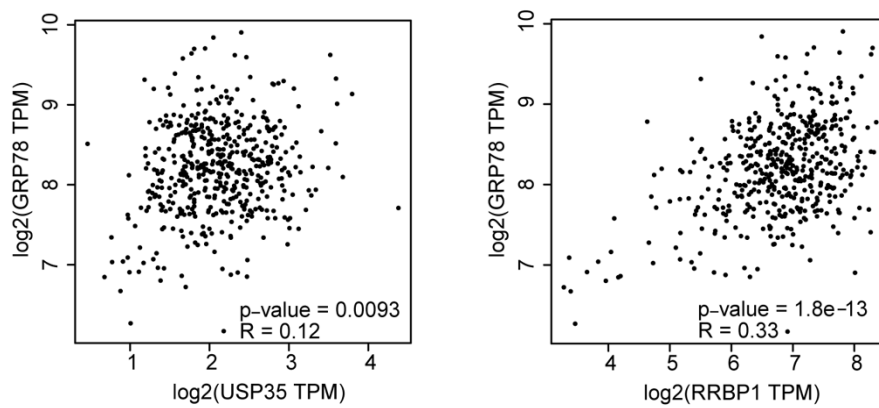

**Fig.S8. GPR78 expression is positively correlated with USP35 and RRBP1 expression in NSCLC tissues.**

(A) The correlation between the expression of GPR78 and USP35 in NSCLC tissues from GEPIA was presented in scatter plot. (B) The correlation between the expression of GPR78 and RRBP1 in NSCLC tissues from GEPIA was presented in scatter plot.

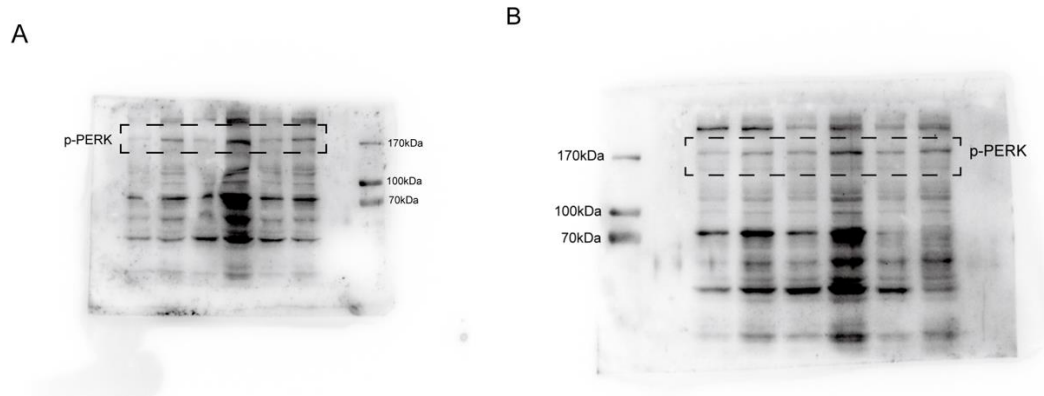

**Fig.S9. USP35 overexpression enhances Tunicamycin (TM)-induced phosphorylation of PERK through up-regulating RRBP1.**

(A) The uncrossed whole blots of phosphor-PERK (p-PERK) in Fig.5A. (B) The uncrossed whole blots of phosphor-PERK (p-PERK) in Fig.5B.

**Supplementary Table 1** The Types, Dilutions and Sources of Antibodies Used for Western Blotting and Immunohistochemical Analysis.

| Antibody              | Working dilution | Working dilution | Species           | Source -Cat. Number                          |
|-----------------------|------------------|------------------|-------------------|----------------------------------------------|
|                       | Western blotting | IHC              |                   |                                              |
| USP35                 | 1:1000           | —                | Rabbit polyclonal | Abcam (Cat. No.ab86791)                      |
| USP35                 | —                | 1:50             | Rabbit polyclonal | Abcam (Cat. No.ab128592)                     |
| RRBP1                 | 1:3000           | 1:100            | Rabbit polyclonal | Proteintech (Cat. No. 22015-1-AP )           |
| GRP78                 | 1:2000           | —                | Rabbit monoclonal | Cell Signaling Technology (Cat. No. 3177)    |
| PERK                  | 1:1000           | —                | Rabbit monoclonal | Cell Signaling Technology (Cat. No. 5683)    |
| phospho-PERK (Thr980) | 1:1000           | —                | Rabbit monoclonal | Cell Signaling Technology (Cat. No. 3179)    |
| CHOP                  | 1:1000           | —                | Mouse monoclonal  | Cell Signaling Technology (Cat. No. 2895)    |
| Cleaved-Caspase3      | 1:1000           | —                | Rabbit monoclonal | Cell Signaling Technology (Cat. No. 9661)    |
| PARP1                 | 1:2000           | —                | Rabbit polyclonal | Proteintech (Cat. No. 13371-1-AP )           |
| Myc-tag               | 1:2000           | —                | Mouse monoclonal  | Cell Signaling Technology (Cat. No. 2276)    |
| Flag-tag              | 1:2000           | —                | Mouse monoclonal  | Sigma (Cat. No.F1804)                        |
| HA-tag                | 1:2000           | —                | Mouse monoclonal  | Sigma (Cat. No. H3663)                       |
| ABIN-2                | 1:1000           | —                | Mouse monoclonal  | Abcam (Cat. No. ab205925)                    |
| Aurora B              | 1:1000           | —                | Mouse monoclonal  | Cell Signaling Technology (Cat. No.3490)     |
| F2RL1                 | 1:1000           | —                | Rabbit monoclonal | Cell Signaling Technology (Cat. No.6976)     |
| $\beta$ -Actin        | 1:3000           | —                | fpolyclonal       | Cell Signaling Technology (Cat. No. ab64659) |





**supplementary table2**

Differential expressed proteins by iTARQ coupled LC-MS/MS analysis from H1299-USP35 vs H1299-EV

| Uniprot<br>Accession | Gene Symol | Fold Change | P value     |
|----------------------|------------|-------------|-------------|
| A0A140VK08           |            | 4.17594     | 1.47E-27    |
| V9HW43               | HEL-S-102  | 3.94118     | 1.74E-25    |
| A0A1B0GTY7           | TMEM191C   | 3.88908     | 5.09E-25    |
| R4GMP5               | DLC1       | 3.11039     | 7.03E-18    |
| Q9NZ23               | YA61       | 3.02576     | 4.37E-17    |
| P80723               | BASP1      | 2.93243     | 3.30E-16    |
| Q96HR9               | REEP6      | 2.87556     | 1.14E-15    |
| P35527               | KRT9       | 2.70968     | 4.20E-14    |
| Q96FN9               | DTD2       | 2.61961     | 2.99E-13    |
| A0A024R8C7           | C9orf74    | 2.56085     | 1.07E-12    |
| P05362               | ICAM1      | 2.52454     | 2.37E-12    |
| Q8NFZ5               | TNIP2      | 2.5133      | 3.02E-12    |
| H6VRG1               | KRT1       | 2.47441     | 7.04E-12    |
| K7WVJ5               | COX2       | 2.4232      | 2.14E-11    |
| P02533               | KRT14      | 2.41033     | 2.83E-11    |
| O75197               | LRP5       | 2.35912     | 8.58E-11    |
| Q96GD4               |            | 2.33068     | 1.59E-10    |
| A0A024R407           | MAP2       | 2.21694     | 1.83E-09    |
| P25942               | CD40       | 2.17379     | 4.59E-09    |
| P28065               | PSMB9      | 2.15042     | 7.54E-09    |
| A4D126               | ISPD       | 2.12851     | 1.20E-08    |
| A0A024R4C5           | ARL4C      | 2.10286     | 2.06E-08    |
| C9JJQ8               | TUBA4A     | 2.07287     | 3.88E-08    |
| Q7Z406               | MYH14      | 1.98886     | 2.24E-07    |
| Q04695               | KRT17      | 1.98764     | 2.30E-07    |
| Q16667               | CDKN3      | 1.94775     | 5.23E-07    |
| Q15323               | KRT31      | 1.94333     | 5.72E-07    |
| Q15582               | TGFB1      | 1.93478     | 6.82E-07    |
| A0A140VK16           | DPEP3      | 1.93052     | 7.44E-07    |
| P08779               | KRT16      | 1.92766     | 7.89E-07    |
| P60880               | SNAP25     | 1.89841     | 1.43E-06    |
| P04259               | KRT6B      | 1.88439     | 1.90E-06    |
| Q00978               | IRF9       | 1.88203     | 1.99E-06    |
| Q9HC29               | NOD2       | 1.87753     | 2.18E-06    |
| P14324               | FDPS       | 1.86903     | 2.59E-06    |
| Q2TAA2               | IAH1       | 1.8589      | 3.18E-06    |
| Q16762               | TST        | 1.85203     | 3.65E-06    |
| Q96BZ9               | TBC1D20    | 1.84953     | 3.83E-06    |
| Q96RY7               | IFT140     | 1.84665     | 4.06E-06    |
| P30536               | TSPO       | 1.84106     | 4.54E-06    |
| Q6PID6               | TTC33      | 1.82968     | 5.70E-06    |
| P13647               | KRT5       | 1.81537     | 7.57E-06    |
| P84022               | SMAD3      | 1.78599     | 1.35E-05    |
| Q9NWW7               | C2orf42    | 1.78356     | 1.42E-05    |
| A0A024RDB4           | HNRPD      | 1.77893     | 1.55E-05    |
| Q96EA4               | SPDL1      | 1.77855     | 1.56E-05    |
| P01023               | A2M        | 1.75643     | 2.41E-05    |
| Q95359               | TACC2      | 1.75641     | 2.41E-05    |
| A0A024R6A0           | ARG2       | 1.74413     | 3.06E-05    |
| A0A024R338           | SFMBT1     | 1.73833     | 3.42E-05    |
| Q96AB3               | ISOC2      | 1.72934     | 4.06E-05    |
| Q96H79               | ZC3HAV1L   | 1.71814     | 5.04E-05    |
| A0A0S2Z428           | KRT6A      | 1.70715     | 6.21E-05    |
| I1U8N0               | HLA-A      | 1.70651     | 6.29E-05    |
| P50454               | SERPINH1   | 1.69888     | 7.27E-05    |
| A0A024R3E3           | APOA1      | 1.69747     | 7.47E-05    |
| O00506               | STK25      | 1.69651     | 7.60E-05    |
| Q59G84               |            | 1.68931     | 8.71E-05    |
| Q9NPH2               | ISYNA1     | 1.67879     | 0.000106219 |
| Q6ZUY8               |            | 1.67766     | 0.000108499 |
| P02792               | FTL        | 1.67427     | 0.000115629 |
| O75521               | ECI2       | 1.67301     | 0.000118395 |

(continued on next page)

supplementary table2 (continued)

| Uniprot<br>Accession | Gene Symol | Fold Change | P value     |
|----------------------|------------|-------------|-------------|
| B2R4F3               |            | 1.67241     | 0.000119734 |
| A0A024R1Y7           | LGP1       | 1.66586     | 0.000135349 |
| Q86Z14               | KLB        | 1.66348     | 0.0001415   |
| Q8TBP6               | SLC25A40   | 1.64988     | 0.000182233 |
| O14933               | UBE2L6     | 1.64879     | 0.000185953 |
| Q9H1E3               | NUCKS1     | 1.64856     | 0.000186747 |
| Q71UF1               | ACO2       | 1.64668     | 0.000193363 |
| A0A024RAD7           | STEAP3     | 1.64181     | 0.000211578 |
| Q14681               | KCTD2      | 1.63932     | 0.000221526 |
| Q14015               |            | 1.63923     | 0.000221894 |
| B3KQS9               |            | 1.63636     | 0.000233943 |
| A1A5C5               | RRBP1      | 1.62918     | 0.000266939 |
| Q13480               | GAB1       | 1.62865     | 0.000269546 |
| A0A0A0MSV9           | TAPBP      | 1.62485     | 0.000288976 |
| Q07021               | C1QBP      | 1.62417     | 0.000292594 |
| B2RCC2               |            | 1.6241      | 0.000292969 |
| Q03135               | CAV1       | 1.62331     | 0.000297233 |
| A0A160YHU8           | HLA-B      | 1.61259     | 0.000361383 |
| P05787               | KRT8       | 1.61077     | 0.000373531 |
| A0A140VKA0           | CALD1      | 1.60888     | 0.000386564 |
| Q86SQ4               | ADGRG6     | 1.60698     | 0.000400112 |
| B2RAF2               |            | 1.59651     | 0.000483413 |
| Q9MY63               | HLA-Cw     | 1.5894      | 0.000549301 |
| P17301               | ITGA2      | 1.5888      | 0.000555243 |
| Q6JQN1               | ACAD10     | 1.58722     | 0.000571187 |
| A0A024R248           | C9orf89    | 1.58629     | 0.000580777 |
| A0A087WYL5           | SEZ6L2     | 1.58585     | 0.000585369 |
| E7D7X9               |            | 1.58506     | 0.000593702 |
| Q08999               | RBL2       | 1.58171     | 0.000630325 |
| Q53TN4               | CYBRD1     | 1.56884     | 0.000792388 |
| Q53G16               |            | 1.56606     | 0.000832335 |
| Q15543               | TAF13      | 1.56157     | 0.000900981 |
| A2A274               | ACO2       | 1.55952     | 0.000934107 |
| H7C311               | ST13       | 1.55764     | 0.000965516 |
| Q53F53               |            | 1.55462     | 0.00101811  |
| Q9UBG0               | MRC2       | 1.54963     | 0.00111111  |
| P54802               | NAGLU      | 1.54672     | 0.00116904  |
| A0A024R644           | CLN5       | 1.54407     | 0.00122432  |
| Q15118               | PKD1       | 1.54302     | 0.00124692  |
| Q7L5N7               | LPCAT2     | 1.53516     | 0.00142923  |
| Q9P1F3               | ABRACL     | 1.53496     | 0.00143418  |
| A8K4A8               |            | 1.52589     | 0.00167716  |
| Q9UK22               | FBXO2      | 1.52497     | 0.0017039   |
| H9S5Y2               | COX2       | 1.51914     | 0.00188309  |
| A8K2B9               |            | 1.51696     | 0.00195462  |
| Q9UGC6               | RGS17      | 1.51494     | 0.00202321  |
| B0QYU2               | CXorf39    | 1.51111     | 0.00215964  |
| Q5SZL2               | CEP85L     | 1.50843     | 0.00226029  |
| Q96IK0               | TMEM101    | 1.50349     | 0.00245766  |
| A0A024RAF7           | ECE1       | 1.50342     | 0.00246057  |
| Q04721               | NOTCH2     | 1.49654     | 0.00276336  |
| Q13509               | TUBB3      | 1.49512     | 0.00283013  |
| H3BRJ5               |            | 1.49369     | 0.00289892  |
| B3KN29               |            | 1.49349     | 0.00290867  |
| A6NFQ7               | DPRX       | 1.49154     | 0.00300536  |
| P04066               | FUCA1      | 1.49045     | 0.00306073  |
| A0A1C7CYX9           | DPYSL2     | 1.49026     | 0.00307048  |
| Q16822               | PCK2       | 1.48581     | 0.00330749  |
| A0A024R2Y6           | SNRK       | 1.48506     | 0.00334912  |
| P24844               | MYL9       | 1.48361     | 0.003431    |
| P32121               | ARRB2      | 1.48343     | 0.0034413   |
| A0A087WX23           | PEG10      | 1.48219     | 0.00351303  |

(continued on next page)

supplementary table2 (continued)

| Uniprot<br>Accession | Gene Symol  | Fold Change | P value    |
|----------------------|-------------|-------------|------------|
| B7Z1N4               |             | 1.48195     | 0.00352708 |
| A2VBB7               | HLA-B       | 1.48119     | 0.00357192 |
| D3DQU2               | TPP1        | 1.47867     | 0.0037245  |
| Q06481               | APLP2       | 1.4786      | 0.00372882 |
| P14384               | CPM         | 1.47569     | 0.00391292 |
| A0A024R7D2           | SLC44A2     | 1.47511     | 0.00395063 |
| Q8NFH9               |             | 1.4729      | 0.0040975  |
| B4DEE8               |             | 1.47106     | 0.00422372 |
| L7N2F9               |             | 1.47004     | 0.00429527 |
| Q9NZN3               | EHD3        | 1.46628     | 0.00456907 |
| A0A024R3Z5           | LANCL1      | 1.46512     | 0.00465682 |
| Q13232               | NME3        | 1.46341     | 0.00478909 |
| P78310               | CXADR       | 1.46059     | 0.00501503 |
| Q96IR7               | HPDL        | 1.45695     | 0.00532161 |
| V9HW87               | HEL-S-299   | 1.4566      | 0.00535201 |
| A0A024RDL9           | PSPH        | 1.45622     | 0.00538518 |
| Q9Y654               | CBX1        | 1.45324     | 0.00565224 |
| Q9C0B7               | TANGO6      | 1.45291     | 0.00568259 |
| A0A024RBU4           | hCG_1981838 | 1.45287     | 0.00568627 |
| Q53FI7               |             | 1.45176     | 0.00578948 |
| Q59FP4               |             | 1.45161     | 0.00580357 |
| P48735               | IDH2        | 1.45029     | 0.00592891 |
| B8ZWD9               | DBI         | 1.44804     | 0.00614846 |
| B4DNW0               |             | 1.44755     | 0.00619727 |
| V9HWG3               | HEL-S-45    | 1.44676     | 0.00627676 |
| A0A024RBN6           | COX6A1      | 1.44607     | 0.00634697 |
| A0A0S2Z377           | ANXA6       | 1.44568     | 0.00638697 |
| P98171               | ARHGAP4     | 1.44432     | 0.00652836 |
| Q8IV76               | PASD1       | 1.44251     | 0.0067211  |
| Q9HAJ7               | SAP30L      | 1.44093     | 0.00689372 |
| P56181               | NDUFV3      | 1.44072     | 0.00691698 |
| Q92506               | HSD17B8     | 1.44048     | 0.00694364 |
| O95671               | ASMTL       | 1.44032     | 0.00696147 |
| A0A024R1Q5           | NAGA        | 1.44005     | 0.00699166 |
| Q96AQ6               | PBXIP1      | 1.43818     | 0.00720416 |
| Q9NRZ5               | AGPAT4      | 1.4375      | 0.00728293 |
| A0A0J9YW36           | STMN3       | 1.43563     | 0.00750375 |
| Q53HG1               |             | 1.43345     | 0.0077691  |
| P05165               | PCCA        | 1.43303     | 0.00782122 |
| Q8N7X0               | ADGB        | 1.43267     | 0.00786617 |
| P29966               | MARCKS      | 1.43034     | 0.00816295 |
| Q6NS36               | FTH1        | 1.4277      | 0.00851193 |
| Q9BX40               | LSM14B      | 1.42707     | 0.00859726 |
| Q96MG8               | PCMTD1      | 1.42659     | 0.00866281 |
| P37802               | TAGLN2      | 1.42395     | 0.00903178 |
| Q5U0B9               |             | 1.4204      | 0.00955117 |
| V9HW53               | HEL-S-277   | 1.41951     | 0.0096857  |
| A0A0S2Z455           | SERPINI1    | 1.41735     | 0.0100196  |
| Q7Z434               | MAVS        | 1.41657     | 0.0101428  |
| Q8NDH3               | NPEPL1      | 1.41636     | 0.0101762  |
| A0A024R5U4           | C15orf48    | 1.41499     | 0.0103968  |
| Q13308               | PTK7        | 1.41398     | 0.0105622  |
| Q3T906               | GNPTAB      | 1.41046     | 0.0111581  |
| Q9UHG3               | PCYOX1      | 1.40984     | 0.0112663  |
| Q9NZT1               | CALML5      | 1.40919     | 0.0113808  |
| O95363               | FARS2       | 1.40728     | 0.0117234  |
| Q15506               | SPA17       | 1.40347     | 0.0124358  |
| H3BQJ5               | NOL3        | 1.40295     | 0.012536   |
| O43633               | CHMP2A      | 1.40279     | 0.0125671  |
| B2R5M8               |             | 1.40245     | 0.0126332  |
| Q9BTT4               | MED10       | 1.40239     | 0.0126449  |
| B2R4S9               | HIST1H2BE   | 1.40202     | 0.0127173  |

(continued on next page)

supplementary table2 (continued)

| Uniprot<br>Accession | Gene Symol   | Fold Change | P value   |
|----------------------|--------------|-------------|-----------|
| A0A024R371           | ARL6IP5      | 1.40161     | 0.012798  |
| F5GXR3               | PTMS         | 1.39861     | 0.013403  |
| Q9C0C4               | SEMA4C       | 1.39839     | 0.0134484 |
| Q0VDC6               | FKBP1A       | 1.39822     | 0.0134836 |
| A0A087X266           | TMEM120A     | 1.39596     | 0.0139595 |
| Q9NXJ5               | PGPEP1       | 1.39506     | 0.0141533 |
| A0A0J9YWL0           | AIM1         | 1.39498     | 0.0141707 |
| Q7Z4H3               | HDCC2        | 1.39454     | 0.0142664 |
| V9HWI3               | HEL-S-130P   | 1.39443     | 0.0142905 |
| Q5HYD7               | DKFZp686K101 | 1.39439     | 0.0142992 |
| Q9NWM3               | CUEDC1       | 1.39381     | 0.0144267 |
| B4DSS4               |              | 1.39367     | 0.0144576 |
| Q9BVA1               | TUBB2B       | 1.39334     | 0.0145307 |
| Q5VU21               |              | 1.39323     | 0.0145552 |
| O95716               | RAB3D        | 1.39301     | 0.0146042 |
| A0A024RAN2           | CAST         | 1.39078     | 0.0151097 |
| A0A024RBQ5           | OAS3         | 1.39061     | 0.0151489 |
| A8K4K1               |              | 1.38964     | 0.0153744 |
| P55085               | F2RL1        | 1.3891      | 0.0155013 |
| Q9GZV5               | VWTR1        | 1.38497     | 0.0165042 |
| A0A0S2Z381           | ADA          | 1.38413     | 0.0167154 |
| B4E2A6               |              | 1.38345     | 0.0168882 |
| P49327               | FASN         | 1.38213     | 0.0172283 |
| P09382               | LGALS1       | 1.38149     | 0.0173955 |
| Q32Q14               | NDUFA7       | 1.3809      | 0.017551  |
| P46939               | UTRN         | 1.38        | 0.0177906 |
| Q9BVX2               | TMEM106C     | 1.37934     | 0.0179683 |
| A0A0F7NGI8           | LRRFIP1      | 1.3792      | 0.0180062 |
| Q13907               | IDI1         | 1.37539     | 0.0190661 |
| Q9H479               | FN3K         | 1.37472     | 0.0192584 |
| Q9BTT0               | ANP32E       | 1.37446     | 0.0193335 |
| E7EV01               | CAPN5        | 1.37384     | 0.0195136 |
| B2RAU5               |              | 1.37375     | 0.0195399 |
| P49184               | DNASE1L1     | 1.37332     | 0.0196659 |
| Q8NHP8               | PLBD2        | 1.37303     | 0.0197513 |
| A0A024QZN7           | C10orf70     | 1.37234     | 0.0199559 |
| A0A024RA75           | HIBADH       | 1.3722      | 0.0199976 |
| Q92831               | KAT2B        | 1.37212     | 0.0200215 |
| Q05639               | EEF1A2       | 1.37204     | 0.0200454 |
| Q6IAX1               | FDFT1        | 1.37188     | 0.0200933 |
| P60903               | S100A10      | 1.37058     | 0.0204865 |
| Q8IY17               | PNPLA6       | 1.36842     | 0.0211556 |
| B4DVA7               |              | 1.36761     | 0.0214116 |
| Q58WW2               | DCAF6        | 1.36717     | 0.0215519 |
| V9HWA6               | HEL32        | 1.36682     | 0.0216641 |
| Q5T749               | KPRP         | 1.3667      | 0.0217026 |
| Q99943               | AGPAT1       | 1.36638     | 0.0218058 |
| Q9BPW8               | NIPSNAP1     | 1.36618     | 0.0218706 |
| B7Z992               |              | 1.36461     | 0.0223849 |
| P20248               | CCNA2        | 1.36421     | 0.0225177 |
| A0A0K2GN21           | BCKDHB       | 1.36385     | 0.0226378 |
| P50897               | PPT1         | 1.36294     | 0.0229442 |
| Q6ZP91               |              | 1.36278     | 0.0229984 |
| A0A0S2Z3Y1           | LGALS3BP     | 1.36156     | 0.0234159 |
| Q6P1L5               | FAM117B      | 1.36151     | 0.0234332 |
| D3DTP7               | hCG_1987383  | 1.36075     | 0.023697  |
| A0A024R0Q4           | PLD3         | 1.36068     | 0.0237214 |
| Q96CM8               | ACSF2        | 1.36068     | 0.0237214 |
| A0A024RD07           | TNRC5        | 1.36045     | 0.0238019 |
| P30044               | PRDX5        | 1.35977     | 0.0240411 |
| P00167               | CYB5A        | 1.35955     | 0.0241191 |
| A0A087WVC6           | PTPRJ        | 1.35906     | 0.0242934 |

(continued on next page)

supplementary table2 (continued)

| Uniprot Accession | Gene Symol     | Fold Change | P value   |
|-------------------|----------------|-------------|-----------|
| A0A024R943        | TOR3A          | 1.35851     | 0.0244904 |
| I3L1Y9            | FLYWCH2        | 1.35786     | 0.0247252 |
| D9YZV5            | TPM1           | 1.35751     | 0.0248524 |
| Q59GW6            |                | 1.35738     | 0.0248998 |
| B7Z8X5            |                | 1.35727     | 0.02494   |
| Q9BZ23            | PANK2          | 1.35669     | 0.0251529 |
| Q7Z7A4            | PXK            | 1.35612     | 0.0253638 |
| L8E8Z4            | DST            | 1.35481     | 0.0258545 |
| R9S3C3            | p14ARF         | 1.35473     | 0.0258847 |
| Q86X29            | LSR            | 1.35459     | 0.0259377 |
| Q59H06            |                | 1.35426     | 0.0260631 |
| Q9UNN8            | PROCR          | 1.3527      | 0.0266631 |
| H0Y5B0            | EPB41L2        | 1.35234     | 0.0268034 |
| E7ESZ7            | NDUFA10        | 1.35208     | 0.0269051 |
| Q5H9L2            | TCEAL5         | 1.35164     | 0.027078  |
| P62253            | UBE2G1         | 1.35153     | 0.0271215 |
| P13535            | MYH8           | 1.35129     | 0.0272163 |
| P11717            | IGF2R          | 1.35011     | 0.0276873 |
| Q8WVY7            | UBLCP1         | 1.34972     | 0.0278447 |
| Q9H3H3            | C11orf68       | 1.34881     | 0.0282149 |
| A0A059QFD5        | COX2           | 1.348       | 0.0285482 |
| A0A0G2JIW1        | HSPA1B         | 1.34773     | 0.0286601 |
| Q96NX8            | STX16          | 1.34674     | 0.0290738 |
| P80217            | IFI35          | 1.34615     | 0.029323  |
| P60891            | PRPS1          | 1.34551     | 0.0295954 |
| Q8NCC3            | PLA2G15        | 1.3452      | 0.0297283 |
| A0A0S2Z3W7        | ITPA           | 1.34372     | 0.0303698 |
| Q5HYJ3            | FAM76B         | 1.34368     | 0.0303873 |
| P42773            | CDKN2C         | 1.34345     | 0.0304882 |
| S6BEP5            | HLA-A          | 1.34308     | 0.0306511 |
| Q00535            | CDK5           | 1.34305     | 0.0306643 |
| A0A0A0MT35        | FAM213B        | 1.34298     | 0.0306953 |
| A0A024R7M1        | RFXANK         | 1.34286     | 0.0307483 |
| A0A087WY96        | SLC6A6         | 1.34279     | 0.0307793 |
| A0A024R3H2        | SORL1          | 1.34177     | 0.0312343 |
| Q30201            | HFE            | 1.34016     | 0.0319649 |
| Q52LW3            | ARHGAP29       | 1.33876     | 0.0326128 |
| Q95822            | MLYCD          | 1.33865     | 0.0326642 |
| Q15742            | NAB2           | 1.3385      | 0.0327344 |
| B9EK46            | CGN            | 1.33806     | 0.0329412 |
| A0A024R491        | C2orf33        | 1.33801     | 0.0329648 |
| E7ETM0            | CSNK1A1        | 1.3376      | 0.0331587 |
| Q5R3I4            | TTC38          | 1.33707     | 0.0334108 |
| A0A0S2Z522        | MYOT           | 1.33668     | 0.0335974 |
| Q9BX67            | JAM3           | 1.33663     | 0.0336215 |
| J3KPT4            | TRABD          | 1.33589     | 0.0339784 |
| A0A024RDX3        | ATP7B          | 1.33567     | 0.0340852 |
| O00461            | GOLIM4         | 1.33489     | 0.0344663 |
| Q6P2D8            | XRRA1          | 1.33366     | 0.0350751 |
| Q6UXH1            | CRELD2         | 1.33183     | 0.035999  |
| A0A0C4DFU2        | SOD2           | 1.33152     | 0.0361577 |
| D3DS14            | FLJ10357       | 1.33062     | 0.0366218 |
| P26583            | HMGB2          | 1.33024     | 0.0368195 |
| O15061            | SYNM           | 1.3299      | 0.0369971 |
| A0A024R5C5        | PC             | 1.32877     | 0.0375931 |
| Q7Z351            | DKFZp686N02209 | 1.32869     | 0.0376356 |
| P02649            | APOE           | 1.32846     | 0.0377581 |
| B2RBV5            |                | 1.32821     | 0.0378916 |
| Q96G28            | CFAP36         | 1.32766     | 0.038187  |
| Q6IBP4            | LAPTM4A        | 1.32747     | 0.0382895 |
| P27701            | CD82           | 1.32737     | 0.0383435 |
| L0R6Q1            | SLC35A4        | 1.32733     | 0.0383651 |

(continued on next page)

supplementary table2 (continued)

| Uniprot<br>Accession | Gene Symol | Fold Change | P value   |
|----------------------|------------|-------------|-----------|
| P22413               | ENPP1      | 1.32683     | 0.0386365 |
| Q7L5Y1               | ENOSF1     | 1.32625     | 0.0389535 |
| P43155               | CRAT       | 1.32545     | 0.0393946 |
| O14657               | TOR1B      | 1.3253      | 0.0394778 |
| Q92520               | FAM3C      | 1.32525     | 0.0395056 |
| Q9NX12               |            | 1.32516     | 0.0395556 |
| Q9H773               | DCTPP1     | 1.32356     | 0.0404546 |
| P22830               | FECH       | 1.32346     | 0.0405114 |
| Q9BW83               | IFT27      | 1.32306     | 0.0407393 |
| A0A024RBL2           | SDSL       | 1.32293     | 0.0408137 |
| Q9UI15               | TAGLN3     | 1.32151     | 0.0416334 |
| P12004               | PCNA       | 1.32139     | 0.0417033 |
| Q9BRA2               | TXNDC17    | 1.32        | 0.0425213 |
| Q5VV89               | MGST3      | 1.31946     | 0.042843  |
| Q9BYV8               | CEP41      | 1.31881     | 0.0432331 |
| A0A1A7UP97           | GALNS      | 1.31877     | 0.0432572 |
| P42126               | ECI1       | 1.31864     | 0.0433357 |
| A8K2V5               |            | 1.31829     | 0.0435475 |
| Q9UPY5               | SLC7A11    | 1.31813     | 0.0436446 |
| Q8IWW6               | ARHGAP12   | 1.31808     | 0.0436751 |
| MOR189               | MPND       | 1.31797     | 0.043742  |
| Q15628               | TRADD      | 1.31771     | 0.0439005 |
| A0A0S2Z433           | NDUFS4     | 1.3177      | 0.0439067 |
| Q96DH6               | MSI2       | 1.31691     | 0.0443918 |
| D3DSV6               | TEX15      | 1.31665     | 0.0445525 |
| P13667               | PDIA4      | 1.31585     | 0.0450502 |
| Q8TDZ2               | MICAL1     | 1.31545     | 0.045301  |
| Q14DG0               | FBXO18     | 1.31533     | 0.0453764 |
| O95425               | SVIL       | 1.31486     | 0.0456731 |
| Q96Q83               | ALKBH3     | 1.31481     | 0.0457048 |
| Q9UK58               | CCNL1      | 1.31479     | 0.0457175 |
| A0A0S2Z5X6           | L3MBTL2    | 1.31469     | 0.0457809 |
| Q9NZU5               | LMCD1      | 1.31416     | 0.0461182 |
| Q8N142               | ADSSL1     | 1.31317     | 0.0467543 |
| B4DJ79               |            | 1.31257     | 0.0471437 |
| A0A024R9V7           | LOC92689   | 1.31257     | 0.0471437 |
| P49821               | NDUFV1     | 1.31257     | 0.0471437 |
| Q14679               | TLL4       | 1.3125      | 0.0471893 |
| O75879               | GATB       | 1.31031     | 0.0486364 |
| B7Z6S9               |            | 1.31031     | 0.0486364 |
| P43353               | ALDH3B1    | 1.31027     | 0.0486632 |
| Q53FA7               | TP53I3     | 1.31007     | 0.0487973 |
| Q02252               | ALDH6A1    | 1.30988     | 0.0489251 |
| P0C7P0               | CISD3      | 1.30933     | 0.0492967 |
| B2R988               |            | 1.30863     | 0.0497733 |
| M0QZ12               | GRAMD1A    | 0.804878    | 0.0496327 |
| E9PKG0               | PLEC       | 0.804833    | 0.0495775 |
| A8K6X2               |            | 0.803941    | 0.0484925 |
| A0A024RB85           | PA2G4      | 0.80394     | 0.0484913 |
| Q96FJ2               | DYNLL2     | 0.8037      | 0.0482026 |
| Q99426               | TBCB       | 0.803468    | 0.0479248 |
| Q96G61               | NUDT11     | 0.802548    | 0.0468357 |
| O00220               | TNFRSF10A  | 0.80248     | 0.046756  |
| Q68CQ7               | GLT8D1     | 0.802165    | 0.0463881 |
| Q9UKR5               | C14orf1    | 0.802041    | 0.046244  |
| B9EH95               | ARVCF      | 0.801786    | 0.0459486 |
| A8K6U7               |            | 0.801164    | 0.0452343 |
| O15554               | KCNN4      | 0.801053    | 0.0451078 |
| E7ETZ0               | CALM1      | 0.801029    | 0.0450805 |
| P17706               | PTPN2      | 0.800922    | 0.0449588 |
| Q9BSR8               | YIPF4      | 0.800826    | 0.04485   |
| Q9NRZ7               | AGPAT3     | 0.800805    | 0.0448261 |

(continued on next page)

supplementary table2 (continued)

| Uniprot<br>Accession | Gene Symol | Fold Change | P value   |
|----------------------|------------|-------------|-----------|
| A0A024R8U7           | ET         | 0.800801    | 0.0448216 |
| Q96AA3               | RFT1       | 0.800777    | 0.0447945 |
| Q6FIF5               | PXMP4      | 0.800763    | 0.0447786 |
| Q5TDH0               | DDI2       | 0.79944     | 0.0433007 |
| Q96ST8               | CEP89      | 0.79927     | 0.0431136 |
| Q9H7F0               | ATP13A3    | 0.798677    | 0.0424662 |
| A8KAH1               |            | 0.798442    | 0.0422118 |
| P47813               | EIF1AX     | 0.79835     | 0.0421125 |
| A0A0M3R6J9           | MAP7D2     | 0.798222    | 0.0419747 |
| Q9Y244               | POMP       | 0.798214    | 0.0419661 |
| Q12792               | TWF1       | 0.798173    | 0.041922  |
| Q9GZZ9               | UBA5       | 0.798157    | 0.0419048 |
| A0A024RDS1           | HSPH1      | 0.798025    | 0.0417633 |
| O95273               | CCNDBP1    | 0.798016    | 0.0417537 |
| P17812               | CTPS1      | 0.797989    | 0.0417248 |
| Q8N531               | FBXL6      | 0.797683    | 0.0413983 |
| G3V161               | KBTD3      | 0.79702     | 0.040698  |
| Q14656               | TMEM187    | 0.796926    | 0.0405995 |
| Q9ULV0               | MYO5B      | 0.79692     | 0.0405932 |
| A8K2U0               | A2ML1      | 0.796196    | 0.0398409 |
| P36551               | CPOX       | 0.796086    | 0.0397276 |
| B4DQ75               | DAP        | 0.795918    | 0.039555  |
| Q9HCE0               | EPG5       | 0.795475    | 0.0391028 |
| Q86U90               | YRDC       | 0.795296    | 0.0389213 |
| Q9UP95               | SLC12A4    | 0.795283    | 0.0389082 |
| Q8IYH5               | ZZZ3       | 0.795276    | 0.038901  |
| A0A024R0Q0           | FLJ12886   | 0.79517     | 0.0387939 |
| A0A024R001           | TMEM14C    | 0.795154    | 0.0387777 |
| P18077               | RPL35A     | 0.795043    | 0.0386659 |
| A1A4S6               | ARHGAP10   | 0.794737    | 0.0383587 |
| E9PR17               | CD59       | 0.794243    | 0.037867  |
| F8W785               | GOLIM4     | 0.794118    | 0.0377434 |
| Q96PC3               | AP1S3      | 0.793621    | 0.0372551 |
| O95210               | STBD1      | 0.79353     | 0.0371663 |
| Q53HB3               |            | 0.793388    | 0.037028  |
| Q9HD45               | TM9SF3     | 0.792965    | 0.0366184 |
| Q96HV5               | TMEM41A    | 0.792683    | 0.0363474 |
| Q8IV53               | DENND1C    | 0.792339    | 0.036019  |
| Q9NRD1               | FBXO6      | 0.792279    | 0.035962  |
| K7EL20               | EIF3G      | 0.79174     | 0.0354528 |
| P15924               | DSP        | 0.791629    | 0.0353487 |
| Q5ZEY3               | GAPD       | 0.791513    | 0.0352402 |
| Q9GZN1               | ACTR6      | 0.789937    | 0.0337919 |
| B4DR61               | SEC61A1    | 0.789907    | 0.0337648 |
| A0A087X1K4           | OR3A1      | 0.789623    | 0.0335092 |
| O60488               | ACSL4      | 0.789568    | 0.0334598 |
| F8W7C6               | RPL10      | 0.789474    | 0.0333757 |
| Q14376               | GALE       | 0.789315    | 0.0332337 |
| F8WES2               | MTAP       | 0.789062    | 0.0330088 |
| P51571               | SSR4       | 0.78876     | 0.032742  |
| Q9NZV1               | CRIM1      | 0.788328    | 0.0323633 |
| P50402               | EMD        | 0.787453    | 0.0316071 |
| Q6PI26               | SHQ1       | 0.786997    | 0.0312188 |
| Q96LD1               | SGCZ       | 0.786089    | 0.030457  |
| D6RB85               | CANX       | 0.785777    | 0.0301988 |
| A0A0A6YY96           | IREB2      | 0.785714    | 0.0301469 |
| A8K9K8               |            | 0.784656    | 0.0292856 |
| A0A0C4DFM2           | ZNF574     | 0.784404    | 0.0290834 |
| A0A024R0W3           | SLC38A2    | 0.784181    | 0.0289055 |
| Q6ZSJ8               | C1orf122   | 0.783394    | 0.0282846 |
| P49770               | EIF2B2     | 0.782847    | 0.0278595 |
| B1AKK2               | DDAH1      | 0.782691    | 0.0277392 |

(continued on next page)



supplementary table2 (continued)

| Uniprot Accession | Gene Symol     | Fold Change | P value   |
|-------------------|----------------|-------------|-----------|
| Q8ND82            | ZNF280C        | 0.782486    | 0.0275818 |
| Q8N806            | UBR7           | 0.782412    | 0.0275251 |
| P24311            | COX7B          | 0.782027    | 0.027232  |
| Q9BT40            | INPP5K         | 0.781219    | 0.026625  |
| Q9UNL2            | SSR3           | 0.780888    | 0.0263796 |
| Q9NP72            | RAB18          | 0.780797    | 0.0263124 |
| O00267            | SUPT5H         | 0.780622    | 0.0261837 |
| Q13501            | SQSTM1         | 0.780396    | 0.0260182 |
| Q59HH7            |                | 0.780369    | 0.0259984 |
| A0A024RBA9        | RAB21          | 0.779453    | 0.0253368 |
| A0A024R0N7        | SAMD4B         | 0.779233    | 0.02518   |
| A0A0A1HAV6        |                | 0.778872    | 0.0249244 |
| Q01469            | FABP5          | 0.778819    | 0.024887  |
| P46976            | GYG1           | 0.778704    | 0.0248061 |
| Q8IY57            | YAF2           | 0.777885    | 0.0242363 |
| F5H136            | TCP1           | 0.777403    | 0.023906  |
| Q9UBQ5            | EIF3K          | 0.777385    | 0.0238938 |
| P62834            | RAP1A          | 0.777219    | 0.0237809 |
| Q587J7            | TDRD12         | 0.777188    | 0.0237599 |
| B3KNS4            | ERVK3-1        | 0.777003    | 0.0236348 |
| Q92685            | ALG3           | 0.776482    | 0.0232852 |
| Q59ET0            |                | 0.776471    | 0.0232779 |
| A0A024R2W4        | DAG1           | 0.776316    | 0.0231748 |
| Q9NR30            | DDX21          | 0.776268    | 0.0231429 |
| Q8WUI4            | HDAC7          | 0.776177    | 0.0230826 |
| O95059            | RPP14          | 0.775878    | 0.0228854 |
| P26038            | MSN            | 0.775746    | 0.0227987 |
| A0A024R7K6        | FKSG24         | 0.774536    | 0.0220171 |
| Q5T094            | RER1           | 0.774257    | 0.02184   |
| Q01968            | OCLR           | 0.774194    | 0.0218002 |
| Q9UBV7            | B4GALT7        | 0.774135    | 0.021763  |
| E9LUH4            | MECP2          | 0.774034    | 0.0216994 |
| A8K1U0            |                | 0.773356    | 0.0212763 |
| P02795            | MT2A           | 0.77305     | 0.0210876 |
| B2RCP7            |                | 0.77193     | 0.0204086 |
| Q99808            | SLC29A1        | 0.771632    | 0.0202311 |
| Q8TCF1            | ZFAND1         | 0.770872    | 0.019784  |
| Q16533            | SNAPC1         | 0.770563    | 0.0196046 |
| A0A0A6YYH1        | C15orf38-AP3S2 | 0.770042    | 0.0193052 |
| O95707            | POP4           | 0.769713    | 0.019118  |
| A0A024RAG1        | MGC4268        | 0.769643    | 0.0190784 |
| B4DR48            |                | 0.76938     | 0.0189302 |
| B8ZZD4            | TAX1BP1        | 0.769231    | 0.0188466 |
| P53611            | RABGGTB        | 0.769097    | 0.0187717 |
| P17096            | HMGA1          | 0.767928    | 0.0181288 |
| Q8N9Q2            | SREK1IP1       | 0.76781     | 0.018065  |
| A0A024R355        | THEX1          | 0.76779     | 0.0180542 |
| H7C1Q3            | HHATL          | 0.766816    | 0.0175344 |
| Q70JA7            | CHSY3          | 0.766667    | 0.017456  |
| Q8WUP2            | FBLIM1         | 0.766402    | 0.0173173 |
| Q99986            | VRK1           | 0.766397    | 0.0173147 |
| A0A024RA87        | 7-Sep          | 0.765858    | 0.0170354 |
| A0A096LP99        | PRAMEF18       | 0.765405    | 0.0168036 |
| B9EGE7            | ZNF507         | 0.764286    | 0.0162423 |
| Q2PPJ7            | RALGAPA2       | 0.763265    | 0.0157439 |
| E7EQ64            | PRSS1          | 0.763069    | 0.0156497 |
| P35247            | SFTPD          | 0.762869    | 0.015554  |
| A0A1B0GU57        | TDRD12         | 0.762288    | 0.015279  |
| Q659C4            | LARP1B         | 0.761578    | 0.0149484 |
| Q8N9M1            | C19orf47       | 0.761152    | 0.014753  |
| P05198            | EIF2S1         | 0.761086    | 0.0147229 |
| Q86TV6            | TTC7B          | 0.760956    | 0.0146638 |

(continued on next page)

supplementary table2 (continued)

| Uniprot<br>Accession | Gene Symol  | Fold Change | P value    |
|----------------------|-------------|-------------|------------|
| Q5H924               | HUWE1       | 0.760835    | 0.0146089  |
| Q96C19               | EFHD2       | 0.760692    | 0.0145443  |
| Q96EF6               | FBXO17      | 0.759207    | 0.0138876  |
| O15446               | CD3EAP      | 0.758748    | 0.0136897  |
| Q9UJ68               | MSRA        | 0.758685    | 0.0136628  |
| Q9UL15               | BAG5        | 0.758467    | 0.0135698  |
| Q12894               | IFRD2       | 0.7584      | 0.0135413  |
| Q9HD64               | XAGE1A      | 0.758065    | 0.0133997  |
| G3V1M7               | ACADVL      | 0.757812    | 0.0132936  |
| O43665               | RGS10       | 0.756976    | 0.012948   |
| B6CAV5               | KIR2DS5     | 0.756661    | 0.0128197  |
| A0A024R601           | CLN6        | 0.756139    | 0.0126095  |
| A0A1B0GUD6           | GRAMD1B     | 0.75605     | 0.012574   |
| A0A0D9SGE8           | PHF6        | 0.755703    | 0.0124362  |
| Q9NS00               | C1GALT1     | 0.755535    | 0.01237    |
| A0A0A0MTS2           | GPI         | 0.755319    | 0.0122853  |
| A0A024R9N6           | EHD4        | 0.754734    | 0.0120582  |
| Q9P2S5               | WRAP73      | 0.754697    | 0.012044   |
| G3V153               | CAPRIN1     | 0.754113    | 0.0118211  |
| Q05513               | PRKCZ       | 0.753932    | 0.0117528  |
| Q59HE8               |             | 0.753927    | 0.0117509  |
| A0A024RAE1           | C1orf33     | 0.753888    | 0.0117362  |
| O94827               | PLEKHG5     | 0.752587    | 0.0112552  |
| B7ZMD6               | IRGQ        | 0.752051    | 0.0110619  |
| P46734               | MAP2K3      | 0.751958    | 0.0110287  |
| P29317               | EPHA2       | 0.750951    | 0.0106741  |
| A0A024RAM4           | MAP1B       | 0.750457    | 0.0105037  |
| A8K9T5               |             | 0.749767    | 0.0102696  |
| Q9H2K2               | TNKS2       | 0.749603    | 0.0102146  |
| B7ZKQ8               | PODXL       | 0.748187    | 0.00975016 |
| J3KPZ4               | C1D         | 0.748099    | 0.0097219  |
| Q14627               | IL13RA2     | 0.747938    | 0.00967036 |
| Q5T6V5               | C9orf64     | 0.747715    | 0.00959939 |
| A0A024R8G6           | SSNA1       | 0.745931    | 0.00904732 |
| P00492               | HPRT1       | 0.745748    | 0.00899224 |
| Q9UPI5               | PLAUR       | 0.74547     | 0.00890914 |
| O95433               | AHSA1       | 0.745081    | 0.00879395 |
| A0A024R1S8           | LASP1       | 0.744098    | 0.00850852 |
| Q14061               | COX17       | 0.744094    | 0.00850737 |
| O96033               | MOCS2       | 0.74359     | 0.00836413 |
| Q03405               | PLAUR       | 0.743491    | 0.00833624 |
| A0A087WT10           | APITD1-CORT | 0.743339    | 0.00829357 |
| Q8NI62               | OK/KNS-cl.6 | 0.742906    | 0.00817303 |
| P36954               | POLR2I      | 0.742555    | 0.00807645 |
| P41208               | CETN2       | 0.741907    | 0.00790066 |
| P51617               | IRAK1       | 0.741563    | 0.00780869 |
| A0A0C4DG49           | PVR         | 0.74143     | 0.00777337 |
| Q15434               | RBMS2       | 0.740707    | 0.00758378 |
| Q16222               | UAP1        | 0.739703    | 0.0073271  |
| Q9Y6I4               | USP3        | 0.738854    | 0.00711588 |
| Q9BUF5               | TUBB6       | 0.738408    | 0.00700705 |
| Q8IWC1               | MAP7D3      | 0.738117    | 0.0069368  |
| Q9BRP1               | PDCD2L      | 0.737676    | 0.00683151 |
| B4E0Y9               | STK26       | 0.73766     | 0.0068277  |
| Q8N7G1               |             | 0.736986    | 0.0066695  |
| A4D1F3               | LOC392745   | 0.735786    | 0.00639564 |
| B2RWP0               | SIPA1L3     | 0.734226    | 0.00605413 |
| Q59ED5               |             | 0.733962    | 0.00599792 |
| H2DF05               | IL10RA      | 0.732611    | 0.00571726 |
| A8K5C2               |             | 0.732472    | 0.00568904 |
| A0A024R0Q5           | PPP1R13L    | 0.732435    | 0.00568154 |
| A0A024R658           | ZFP36L1     | 0.731641    | 0.00552281 |

(continued on next page)

supplementary table2 (continued)

| Uniprot<br>Accession | Gene Symol | Fold Change | P value     |
|----------------------|------------|-------------|-------------|
| Q96DW6               | SLC25A38   | 0.731383    | 0.00547207  |
| P12429               | ANXA3      | 0.731357    | 0.00546697  |
| P26022               | PTX3       | 0.731118    | 0.00542037  |
| Q3KQV9               | UAP1L1     | 0.72973     | 0.0051564   |
| Q96CX6               | LRRC58     | 0.72908     | 0.00503666  |
| P61225               | RAP2B      | 0.72686     | 0.00464568  |
| P55010               | EIF5       | 0.725       | 0.00433866  |
| Q96GX2               | ATXN7L3B   | 0.723461    | 0.0040981   |
| P43356               | MAGEA2     | 0.721448    | 0.00380105  |
| Q9H6K4               | OPA3       | 0.721182    | 0.00376323  |
| Q9BVK8               | TMEM147    | 0.721063    | 0.00374643  |
| P21333               | FLNA       | 0.720602    | 0.00368192  |
| Q9Y5Z9               | UBIAD1     | 0.719298    | 0.00350468  |
| Q86WQ0               | NR2C2AP    | 0.718808    | 0.00344002  |
| A0A024QZF8           | EMP3       | 0.718657    | 0.00342031  |
| A0A024R5J6           | CHCHD8     | 0.718057    | 0.00334296  |
| Q5VUJ6               | LRCH2      | 0.718023    | 0.00333862  |
| B2RBX9               |            | 0.716592    | 0.00316049  |
| A8MT69               | STRA13     | 0.715799    | 0.00306539  |
| Q86SE9               | PCGF5      | 0.71544     | 0.00302317  |
| P11441               | UBL4A      | 0.714549    | 0.00292059  |
| K7EJ96               | ROGDI      | 0.714475    | 0.00291221  |
| A8K556               |            | 0.714418    | 0.00290577  |
| Q0D2I6               | FEZ2       | 0.713928    | 0.00285091  |
| Q8IXW5               | RPAP2      | 0.713918    | 0.0028498   |
| Q9UQ03               | CORO2B     | 0.711193    | 0.0026365   |
| A0A024R0P9           | TOMM40     | 0.711255    | 0.00256735  |
| C4P096               | DISC1      | 0.710692    | 0.00251088  |
| P19623               | SRM        | 0.709562    | 0.00240084  |
| Q9H098               | FAM107B    | 0.708729    | 0.00232247  |
| Q16831               | UPP1       | 0.707826    | 0.00224006  |
| P05412               | JUN        | 0.707452    | 0.00220669  |
| A0A024R0L5           | GSK3A      | 0.707361    | 0.00219863  |
| Q9P2N7               | KLHL13     | 0.707062    | 0.00217235  |
| P04731               | MT1A       | 0.704803    | 0.00198261  |
| O43707               | ACTN4      | 0.70461     | 0.0019671   |
| P60468               | SEC61B     | 0.703256    | 0.00186126  |
| B2R6I6               |            | 0.701395    | 0.00172401  |
| Q86TX8               |            | 0.701266    | 0.00171484  |
| B9EIK3               | DDX26B     | 0.699057    | 0.00156433  |
| Q9BWH2               | FUNDC2     | 0.697987    | 0.00149573  |
| O96005               | CLPTM1     | 0.697987    | 0.00149573  |
| P30530               | AXL        | 0.697077    | 0.0014395   |
| Q9NSY1               | BMP2K      | 0.69678     | 0.00142156  |
| Q9GZS1               | POLR1E     | 0.695922    | 0.00137084  |
| A0A1B0GV05           | RAP1GAP2   | 0.695614    | 0.00135303  |
| D3DWX8               | FAM3A      | 0.695489    | 0.00134586  |
| O75145               | PPFIA3     | 0.694859    | 0.00131024  |
| P04083               | ANXA1      | 0.693192    | 0.00121999  |
| B4DLE6               |            | 0.690759    | 0.0010982   |
| Q9Y3L5               | RAP2C      | 0.690499    | 0.00108585  |
| Q8IYD8               | FANCM      | 0.687914    | 0.000969617 |
| Q96D05               | C10orf35   | 0.687791    | 0.000964373 |
| Q9H8P0               | SRD5A3     | 0.685393    | 0.000867099 |
| P78358               | CTAG1A     | 0.684811    | 0.000844857 |
| Q8IXJ6               | SIRT2      | 0.682511    | 0.000761865 |
| H0YG38               | PRPF40A    | 0.68231     | 0.000754973 |
| A0A087WVP4           | SMTN       | 0.682196    | 0.000751089 |
| A0A024R5Z9           | PKM2       | 0.681287    | 0.000720747 |
| Q96DU7               | ITPKC      | 0.680352    | 0.00069069  |
| P27469               | G0S2       | 0.67801     | 0.00062028  |
| A0A024RAM2           | GLRX       | 0.677515    | 0.000606251 |

(continued on next page)

supplementary table2 (continued)

| Uniprot<br>Accession | Gene Symol  | Fold Change | P value     |
|----------------------|-------------|-------------|-------------|
| Q8N4H5               | TOMM5       | 0.677388    | 0.000602699 |
| Q9BW60               | ELOVL1      | 0.676316    | 0.000573445 |
| Q14315               | FLNC        | 0.675893    | 0.000562257 |
| Q9BVJ7               | DUSP23      | 0.675676    | 0.000556594 |
| Q4G148               | GXYLT1      | 0.675439    | 0.000550469 |
| A4IF29               | UST6        | 0.674528    | 0.000527483 |
| A8K8D9               |             | 0.67288     | 0.000488086 |
| Q8IUS5               | EPHX4       | 0.672163    | 0.000471789 |
| A2VCK8               | TMSB4X      | 0.670068    | 0.000426944 |
| G8I2S8               |             | 0.668449    | 0.000394963 |
| Q8N2A8               | PLD6        | 0.668333    | 0.000392757 |
| P31150               | GDI1        | 0.666972    | 0.000367692 |
| Q99584               | S100A13     | 0.666667    | 0.000362278 |
| B2R9B4               |             | 0.665906    | 0.000349081 |
| Q9H8M7               | FAM188A     | 0.661319    | 0.000278336 |
| P51572               | BCAP31      | 0.659981    | 0.000260304 |
| P55809               | OXCT1       | 0.658017    | 0.000235751 |
| Q8NE91               | TM4SF1      | 0.652535    | 0.000177935 |
| Q5VT66               | 1-Mar       | 0.649208    | 0.000149477 |
| O00151               | PDLIM1      | 0.649074    | 0.000148423 |
| A0A024QYT5           | SERPINE1    | 0.645744    | 0.000124314 |
| Q15738               | NSDHL       | 0.645075    | 0.000119926 |
| A0A024RC10           | hCG_1740677 | 0.64168     | 9.98E-05    |
| J3KQN4               | RPL36A      | 0.637655    | 7.99E-05    |
| O14737               | PDCD5       | 0.636598    | 7.53E-05    |
| A0A075B6G3           | DMD         | 0.633248    | 6.24E-05    |
| J3KKSZ0              | EIF4A1      | 0.627586    | 4.50E-05    |
| A0A087WXL3           | POLQ        | 0.626536    | 4.23E-05    |
| B4DW33               |             | 0.62605     | 4.11E-05    |
| A0A0C4DFN3           | MGLL        | 0.620893    | 3.03E-05    |
| Q9NP84               | TNFRSF12A   | 0.619125    | 2.72E-05    |
| Q8N6I1               | EID2        | 0.618907    | 2.69E-05    |
| Q14320               | FAM50A      | 0.617306    | 2.44E-05    |
| A0A140VJM4           | KCTD12      | 0.616667    | 2.34E-05    |
| O60344               | ECE2        | 0.615442    | 2.17E-05    |
| B9VJ61               | TLR5        | 0.609558    | 1.50E-05    |
| Q86VH2               | KIF27       | 0.606205    | 1.21E-05    |
| Q9NSC2               | SALL1       | 0.604594    | 1.09E-05    |
| Q96FQ6               | S100A16     | 0.603545    | 1.02E-05    |
| I3L3X0               | ZG16B       | 0.600285    | 8.25E-06    |
| F8VX04               | SLC38A1     | 0.598738    | 7.45E-06    |
| O43719               | HTATSF1     | 0.598598    | 7.38E-06    |
| P43360               | MAGEA6      | 0.597122    | 6.68E-06    |
| A0A087WUC3           | SCNN1D      | 0.589944    | 4.10E-06    |
| A0A024QZM9           | PLAU        | 0.580645    | 2.12E-06    |
| O00373               |             | 0.577815    | 1.73E-06    |
| Q9P0U1               | TOMM7       | 0.573786    | 1.28E-06    |
| A0A024RDD9           | CXCL2       | 0.571645    | 1.09E-06    |
| P0C5Z0               | H2AFB2      | 0.564126    | 6.13E-07    |
| Q7RTU9               | STRC        | 0.544828    | 1.27E-07    |
| P24390               | KDELRL1     | 0.542857    | 1.07E-07    |
| Q8TBS0               | C18orf21    | 0.539749    | 8.18E-08    |
| O00622               | CYR61       | 0.537358    | 6.63E-08    |
| Q60FE5               | FLNA        | 0.528787    | 3.07E-08    |
| P10620               | MGST1       | 0.52462     | 2.08E-08    |
| O95567               | C22orf31    | 0.514901    | 8.21E-09    |
| P56277               | CMC4        | 0.5109      | 5.53E-09    |
| B2R9M7               |             | 0.498512    | 1.55E-09    |

**supplementary table3**

Differential expressed proteins by iTARQ coupled LC-MS/MS analysis from H1299-shUSP35-2 vs.H1299-scramble

| Uniprot Accession | Gene Symol     | Fold Change | P value   |
|-------------------|----------------|-------------|-----------|
| G3V1M7            | ACADVL         | 8.19585     | 5.93E-194 |
| O00373            |                | 4.27163     | 4.78E-94  |
| Q7RTU9            | STRC           | 4.02265     | 1.16E-86  |
| P05161            | ISG15          | 3.40596     | 8.53E-68  |
| D9ZGG2            | VTN            | 3.26235     | 2.69E-63  |
| P09914            | IFIT1          | 2.72489     | 3.35E-46  |
| I3L3X0            | ZG16B          | 2.69063     | 4.20E-45  |
| Q6P2D8            | XRRA1          | 2.43041     | 9.02E-37  |
| Q8NE91            | TM4SF1         | 2.42702     | 1.16E-36  |
| B2R9M7            |                | 2.41781     | 2.28E-36  |
| O95567            | C22orf31       | 2.36423     | 1.16E-34  |
| Q5T765            | IFIT3          | 2.24935     | 5.11E-31  |
| Q5VT66            | 1-Mar          | 2.2399      | 1.02E-30  |
| K7EJ96            | ROGDI          | 2.2009      | 1.72E-29  |
| Q9HB65            | ELL3           | 2.18215     | 6.67E-29  |
| B3VL31            |                | 2.17609     | 1.03E-28  |
| C4P096            | DISC1          | 2.11806     | 6.72E-27  |
| A0A087WUC3        | SCNN1D         | 2.06786     | 2.42E-25  |
| Q9GZN1            | ACTR6          | 2.01051     | 1.41E-23  |
| H0Y7R8            | AFDN           | 2.00895     | 1.57E-23  |
| P62745            | RHOB           | 1.81807     | 8.16E-18  |
| Q0D2M7            | DNAJC13        | 1.81062     | 1.35E-17  |
| Q9NXG6            | P4HTM          | 1.80694     | 1.72E-17  |
| Q8IZQ1            | WDFY3          | 1.80425     | 2.06E-17  |
| A0A024QYX0        | EBP            | 1.78875     | 5.79E-17  |
| Q8IY21            | DDX60          | 1.78069     | 9.89E-17  |
| H7C114            | PCLO           | 1.76196     | 3.41E-16  |
| Q6AZW6            | ATF6B          | 1.72055     | 5.10E-15  |
| Q53HB4            |                | 1.71267     | 8.49E-15  |
| A0A0A0MRJ7        | F5             | 1.70568     | 1.33E-14  |
| Q86VH2            | KIF27          | 1.69543     | 2.57E-14  |
| A4IF29            | UST6           | 1.65808     | 2.75E-13  |
| O95837            | GNA14          | 1.65097     | 4.30E-13  |
| P24390            | KDELR1         | 1.61792     | 3.35E-12  |
| P15531            | NME1           | 1.59172     | 1.66E-11  |
| P09466            | PAEP           | 1.58968     | 1.88E-11  |
| O95786            | DDX58          | 1.58353     | 2.72E-11  |
| P58004            | SESN2          | 1.56617     | 7.70E-11  |
| Q59GW5            |                | 1.56083     | 1.06E-10  |
| A0A0F7G8J1        | PLG            | 1.55986     | 1.12E-10  |
| A8K304            |                | 1.53102     | 6.09E-10  |
| B2R7U4            |                | 1.52784     | 7.32E-10  |
| Q9UE89            |                | 1.52745     | 7.49E-10  |
| A0A024QZU8        | RREB1          | 1.52547     | 8.40E-10  |
| A0A024R3E3        | APOA1          | 1.52022     | 1.14E-09  |
| Q8NEN9            | PDZD8          | 1.51754     | 1.33E-09  |
| Q495P6            | TLR8           | 1.51106     | 1.92E-09  |
| A6NCK2            | TRIM43B        | 1.50835     | 2.24E-09  |
| A0A0B6XJY0        | CASK           | 1.50779     | 2.32E-09  |
| A5Z217            |                | 1.5059      | 2.58E-09  |
| A5A3E0            | POTEF          | 1.50236     | 3.16E-09  |
| Q13488            | TCIRG1         | 1.50175     | 3.27E-09  |
| Q9NWA0            | MED9           | 1.50136     | 3.34E-09  |
| Q5CZB5            | DKFZp686M0430  | 1.48235     | 9.74E-09  |
| Q9P2H3            | IFT80          | 1.47686     | 1.32E-08  |
| Q7Z351            | DKFZp686N02209 | 1.47091     | 1.84E-08  |
| Q96MH2            | HEXIM2         | 1.47052     | 1.88E-08  |
| Q9UII4            | HERC5          | 1.46732     | 2.24E-08  |
| B5MEA4            | ANKRD12        | 1.4578      | 3.77E-08  |
| Q9H9J5            |                | 1.45703     | 3.94E-08  |
| Q969T4            | UBE2E3         | 1.45595     | 4.17E-08  |
| P02533            | KRT14          | 1.4547      | 4.47E-08  |

(continued on next page)

supplementary table3 (continued)

| Uniprot<br>Accession | Gene Symol | Fold Change | P value     |
|----------------------|------------|-------------|-------------|
| A0A059RHF6           | COX1       | 1.44236     | 8.71E-08    |
| Q5BIX2               | ARKL1      | 1.43905     | 1.04E-07    |
| Q8NC51               | SERBP1     | 1.43546     | 1.26E-07    |
| P62380               | TBPL1      | 1.43417     | 1.35E-07    |
| A0A024R001           | TMEM14C    | 1.43077     | 1.62E-07    |
| H9S5Y2               | COX2       | 1.42821     | 1.85E-07    |
| B4DR60               |            | 1.42687     | 1.99E-07    |
| P05412               | JUN        | 1.42534     | 2.16E-07    |
| P02786               | TFRC       | 1.41818     | 3.14E-07    |
| B7Z4T6               |            | 1.41337     | 4.04E-07    |
| Q8TCT8               | SPPL2A     | 1.40909     | 5.04E-07    |
| B4DZK2               |            | 1.40892     | 5.09E-07    |
| Q59ET0               |            | 1.40496     | 6.24E-07    |
| Q96K80               | ZC3H10     | 1.40481     | 6.29E-07    |
| P15559               | NQO1       | 1.4021      | 7.24E-07    |
| B4DM67               |            | 1.39728     | 9.26E-07    |
| B3KN09               |            | 1.39588     | 9.95E-07    |
| G3V161               | KBTBD3     | 1.3903      | 1.32E-06    |
| Q5HYJ3               | FAM76B     | 1.38855     | 1.44E-06    |
| A0A024RBV9           | TBL1X      | 1.38293     | 1.92E-06    |
| H0YBL0               | CDH17      | 1.3826      | 1.95E-06    |
| I7H1S4               | COX3       | 1.38209     | 2.00E-06    |
| Q8NFU1               | BEST2      | 1.37701     | 2.58E-06    |
| Q8N2U0               | TMEM256    | 1.37634     | 2.67E-06    |
| O14521               | SDHD       | 1.37204     | 3.30E-06    |
| Q9NQR7               | CCDC177    | 1.37051     | 3.56E-06    |
| P13533               | MYH6       | 1.36986     | 3.68E-06    |
| Q8N7X0               | ADGB       | 1.36605     | 4.44E-06    |
| B5BU36               | TNFRSF10B  | 1.36153     | 5.54E-06    |
| P13647               | KRT5       | 1.35929     | 6.18E-06    |
| B2RBH6               |            | 1.359       | 6.26E-06    |
| Q9BTV5               | FSD1       | 1.3586      | 6.39E-06    |
| A0A024RB05           | CD63       | 1.35368     | 8.11E-06    |
| Q3KQV9               | UAP1L1     | 1.35239     | 8.63E-06    |
| A0PJW6               | TMEM223    | 1.35211     | 8.75E-06    |
| Q9ULS5               | TMCC3      | 1.3512      | 9.14E-06    |
| H7BY16               | NCL        | 1.35034     | 9.53E-06    |
| Q8N2H4               | SYS1       | 1.35023     | 9.58E-06    |
| D6RIT2               | HNRNPH1    | 1.34783     | 1.08E-05    |
| A0A161I202           | LTF        | 1.3341      | 2.06E-05    |
| Q9BQT8               | SLC25A21   | 1.33333     | 2.14E-05    |
| A0A024RDJ1           | DC2        | 1.32908     | 2.61E-05    |
| B3KSH8               |            | 1.32772     | 2.78E-05    |
| A8MYA2               | CXorf49    | 1.32235     | 3.57E-05    |
| P48507               | GCLM       | 1.31567     | 4.85E-05    |
| G3CIG1               | MUC19      | 1.31284     | 5.51E-05    |
| B3KSB5               |            | 1.30686     | 7.22E-05    |
| B4E0X8               |            | 1.3051      | 7.82E-05    |
| Q96NB2               | SFXN2      | 1.30435     | 8.09E-05    |
| Q96A26               | FAM162A    | 1.30328     | 8.48E-05    |
| P0CG38               | POT1       | 1.30307     | 8.57E-05    |
| Q96BI3               | APH1A      | 1.29814     | 0.000106652 |
| Q9P0U1               | TOMM7      | 1.29758     | 0.000109329 |
| P28562               | DUSP1      | 1.29589     | 0.000117852 |
| P15336               | ATF2       | 1.29581     | 0.00011828  |
| H9NKY4               | IFITM3     | 1.29205     | 0.000139523 |
| C0JYY2               | APOB       | 1.29082     | 0.000147299 |
| B4DVS4               |            | 1.29077     | 0.000147591 |
| H0Y9L1               | NEDD4      | 1.28878     | 0.000161032 |
| Q562M3               | ACT        | 1.28874     | 0.000161278 |
| Q8IUH5               | ZDHHC17    | 1.28636     | 0.000178906 |
| I7GW38               | ND3        | 1.28619     | 0.000180207 |

(continued on next page)

supplementary table3 (continued)

| Uniprot<br>Accession | Gene Symol | Fold Change | P value     |
|----------------------|------------|-------------|-------------|
| B4E1J2               |            | 1.28523     | 0.000187875 |
| P13645               | KRT10      | 1.2785      | 0.000251111 |
| Q5TG30               | ARHGAP40   | 1.27832     | 0.00025304  |
| A0A024R911           | XPR1       | 1.27618     | 0.000277226 |
| B4DR61               | SEC61A1    | 1.27565     | 0.000283503 |
| Q9BVK8               | TMEM147    | 1.27235     | 0.000326192 |
| A8K6Q8               |            | 1.2722      | 0.000328309 |
| F5H265               | UBC        | 1.26835     | 0.00038614  |
| A0A059QQM1           | ATP6       | 1.26745     | 0.000400855 |
| R4GMX5               | BSG        | 1.26419     | 0.000459422 |
| I6L8A6               | RBBP8      | 1.2618      | 0.000507315 |
| B2RBJ7               |            | 1.26157     | 0.000512193 |
| A8KAH1               |            | 1.26155     | 0.000512553 |
| Q9Y644               | RFNG       | 1.26132     | 0.000517469 |
| Q9BZE2               | PUS3       | 1.26015     | 0.000543128 |
| A0A024QZF8           | EMP3       | 1.259       | 0.000569602 |
| Q8VXV6               | PLEC1      | 1.25878     | 0.000574874 |
| O95359               | TACC2      | 1.25829     | 0.000586563 |
| Q6P2P2               | PRMT9      | 1.2581      | 0.000591088 |
| B4DRA2               |            | 1.25799     | 0.000593759 |
| E9PL71               | EEF1D      | 1.25524     | 0.000664641 |
| Q7Z7E8               | UBE2Q1     | 1.25461     | 0.000681913 |
| A8K4T9               |            | 1.25264     | 0.000738906 |
| A0A087WVA1           | SELT       | 1.25025     | 0.000814109 |
| Q99541               | PLIN2      | 1.24893     | 0.000858766 |
| O15431               | SLC31A1    | 1.24804     | 0.000890339 |
| A4D1W6               | C7orf11    | 1.24626     | 0.000956213 |
| B2RDY3               |            | 1.24608     | 0.00096316  |
| A0A024R0W3           | SLC38A2    | 1.24583     | 0.000973014 |
| A0A024RDX3           | ATP7B      | 1.24552     | 0.000985173 |
| B4E388               |            | 1.2398      | 0.00123674  |
| Q9Y3D5               | MRPS18C    | 1.23481     | 0.0015049   |
| B2RWP4               | TACC2      | 1.23427     | 0.00153745  |
| Q53GL6               | RALY       | 1.23341     | 0.00158968  |
| F8WB05               | ATXN2      | 1.23303     | 0.00161327  |
| Q59EW6               |            | 1.23212     | 0.00167125  |
| D6W601               | ADAT3      | 1.23123     | 0.00173023  |
| Q9NS00               | C1GALT1    | 1.23085     | 0.00175592  |
| Q5K651               | SAMD9      | 1.23037     | 0.00178882  |
| A0A024R8T9           | SYNGR2     | 1.23006     | 0.00181046  |
| Q71DI3               | HIST2H3A   | 1.2296      | 0.00184277  |
| P48436               | SOX9       | 1.22825     | 0.00194161  |
| F8VTV8               | CDK4       | 1.22779     | 0.00197626  |
| K7EJB5               | SNRPD2     | 1.22727     | 0.002016    |
| Q13501               | SQSTM1     | 1.22679     | 0.00205348  |
| O43422               | THAP12     | 1.22662     | 0.00206697  |
| Q8NEA6               | GLIS3      | 1.22584     | 0.00212961  |
| H0YMV8               | RPS27L     | 1.22514     | 0.00218755  |
| Q02952               | AKAP12     | 1.22357     | 0.00232306  |
| A4D126               | ISPD       | 1.22326     | 0.00235032  |
| Q8IYD8               | FANCM      | 1.22222     | 0.00244512  |
| P15882               | CHN1       | 1.22208     | 0.00245872  |
| Q9NSC2               | SALL1      | 1.22174     | 0.00249036  |
| Q96F46               | IL17RA     | 1.22135     | 0.00252723  |
| Q9BVN2               | RUSC1      | 1.22103     | 0.00255821  |
| Q6P161               | MRPL54     | 1.22092     | 0.00256923  |
| A0A0X7YVE4           | HLA-C      | 1.22019     | 0.00264035  |
| H6VRG1               | KRT1       | 1.21908     | 0.00275421  |
| Q6ZP91               |            | 1.21899     | 0.00276343  |
| P29401               | TKT        | 1.21725     | 0.00295052  |
| Q16533               | SNAPC1     | 1.21655     | 0.00302806  |
| D3DS77               | KIAA0323   | 1.21625     | 0.00306282  |

(continued on next page)

supplementary table3 (continued)

| Uniprot<br>Accession | Gene Symol  | Fold Change | P value    |
|----------------------|-------------|-------------|------------|
| A0A1B0GUH9           | LCOR        | 1.2156      | 0.00313786 |
| P42677               | RPS27       | 1.21509     | 0.00319835 |
| A0A024R5J6           | CHCHD8      | 1.21455     | 0.00326315 |
| A8K725               |             | 1.21366     | 0.00337279 |
| H7C1Q3               | HHATL       | 1.21242     | 0.00353255 |
| H0YDV2               | CCDC73      | 1.21167     | 0.00363176 |
| Q2TSD0               |             | 1.21147     | 0.00365886 |
| Q9NRZ5               | AGPAT4      | 1.21143     | 0.00366358 |
| Q9P2C4               | TMEM181     | 1.21113     | 0.00370447 |
| Q9BVA1               | TUBB2B      | 1.21066     | 0.00376951 |
| B4DSI9               |             | 1.21047     | 0.0037968  |
| Q6QNY1               | BLOC1S2     | 1.20892     | 0.00401873 |
| Q14061               | COX17       | 1.20594     | 0.00448262 |
| H0Y4U4               | PAEP        | 1.20532     | 0.00458528 |
| Q96AB3               | ISOC2       | 1.20513     | 0.00461726 |
| Q9BRS2               | RIOK1       | 1.20452     | 0.00472055 |
| Q9H582               | ZNF644      | 1.20368     | 0.00486577 |
| Q9H0H3               | KLHL25      | 1.20348     | 0.00490167 |
| H0Y5B0               | EPB41L2     | 1.20339     | 0.00491806 |
| B7ZVY3               | GAGE4       | 1.20294     | 0.00499803 |
| Q6P4Q7               | CNNM4       | 1.2         | 0.00555754 |
| Q0P5W4               | RCE1        | 1.2         | 0.00555754 |
| Q0PNE2               | ELP6        | 0.833333    | 0.0449174  |
| B3KWQ9               |             | 0.833192    | 0.0447005  |
| Q9UHP3               | USP25       | 0.833034    | 0.0444584  |
| O75319               | DUSP11      | 0.832889    | 0.044237   |
| Q8IY22               | CMIP        | 0.832856    | 0.0441866  |
| Q16626               | MEA1        | 0.83285     | 0.0441781  |
| Q8TEQ8               | PIGO        | 0.832734    | 0.0440015  |
| B4DNA3               |             | 0.832669    | 0.0439039  |
| P31273               | HOXC8       | 0.832517    | 0.0436742  |
| Q13946               | PDE7A       | 0.832432    | 0.0435468  |
| Q53GT1               | KLHL22      | 0.832161    | 0.0431403  |
| Q15468               | STIL        | 0.832124    | 0.043086   |
| Q9BQD7               | FAM173A     | 0.831599    | 0.042309   |
| A0A024R8I8           | C9orf140    | 0.831291    | 0.0418595  |
| Q6PI26               | SHQ1        | 0.83046     | 0.0406638  |
| I3NI25               | FOPNL       | 0.830009    | 0.0400269  |
| P33981               | TTK         | 0.829767    | 0.0396883  |
| B4E2F2               |             | 0.829767    | 0.0396896  |
| P41229               | KDM5C       | 0.829746    | 0.0396591  |
| P04350               | TUBB4A      | 0.829736    | 0.0396461  |
| A0A087WT10           | APITD1-CORT | 0.829443    | 0.0392402  |
| Q15800               | MSMO1       | 0.828571    | 0.0380514  |
| Q9UHD8               | 9-Sep       | 0.828496    | 0.03795    |
| D6W4Z6               | hCG_23833   | 0.828452    | 0.0378907  |
| B7Z1N4               |             | 0.828383    | 0.0377982  |
| Q9NYG5               | ANAPC11     | 0.828358    | 0.0377652  |
| A8K322               |             | 0.828322    | 0.0377168  |
| Q9NQ11               | ATP13A2     | 0.828167    | 0.0375095  |
| Q53EQ6               | TIGD5       | 0.828014    | 0.0373072  |
| P17483               | HOXB4       | 0.827907    | 0.0371654  |
| A1A4S6               | ARHGAP10    | 0.827877    | 0.0371252  |
| B3KWY9               |             | 0.827751    | 0.0369602  |
| H7BYJ1               | RNF34       | 0.827681    | 0.0368679  |
| Q9NWW7               | C2orf42     | 0.827586    | 0.0367438  |
| A0A0S2Z455           | SERPINI1    | 0.827521    | 0.0366588  |
| A8K383               |             | 0.827381    | 0.036476   |
| Q9NZN1               | IL1RAPL1    | 0.827139    | 0.0361626  |
| H8Y6P7               | GCOM1       | 0.826691    | 0.0355882  |
| E7EQB3               | TSEN34      | 0.82668     | 0.0355732  |
| Q96QE3               | ATAD5       | 0.826561    | 0.0354223  |

(continued on next page)



supplementary table3 (continued)

| Uniprot<br>Accession | Gene Symol  | Fold Change | P value   |
|----------------------|-------------|-------------|-----------|
| Q9UBV7               | B4GALT7     | 0.826512    | 0.0353607 |
| A8K313               |             | 0.826511    | 0.0353585 |
| Q9Y448               | KNSTRN      | 0.826389    | 0.0352043 |
| O95551               | TDP2        | 0.826206    | 0.0349734 |
| A0A024R0Q6           | ERCC1       | 0.826167    | 0.0349243 |
| A0A140LJL2           | CBARP       | 0.82579     | 0.0344543 |
| P43353               | ALDH3B1     | 0.825411    | 0.033987  |
| D6W5U7               | STAG3       | 0.824832    | 0.0332815 |
| F8W0Q9               | PPHLN1      | 0.82453     | 0.0329194 |
| Q9BSR8               | YIPF4       | 0.824434    | 0.0328044 |
| Q92896               | GLG1        | 0.823899    | 0.0321725 |
| Q96H35               | RBM18       | 0.823851    | 0.032116  |
| Q8WXH0               | SYNE2       | 0.823684    | 0.0319209 |
| Q96E14               | RMI2        | 0.823579    | 0.0317988 |
| O75147               | OBSL1       | 0.823529    | 0.0317409 |
| Q8IY45               | AMN1        | 0.823256    | 0.0314248 |
| B2RNT7               | KLHDC5      | 0.823049    | 0.0311875 |
| D3DS14               | FLJ10357    | 0.822993    | 0.0311232 |
| B2RD96               |             | 0.822938    | 0.0310604 |
| H7BYT1               | CSNK1D      | 0.822857    | 0.0309688 |
| P54753               | EPHB3       | 0.822796    | 0.0308994 |
| O43909               | EXTL3       | 0.822763    | 0.0308616 |
| A0A0S2Z4N0           | MEF2A       | 0.821866    | 0.0298589 |
| P54821               | PRRX1       | 0.821818    | 0.029806  |
| P15924               | DSP         | 0.821525    | 0.0294842 |
| A0A024R6G6           | NDUFB1      | 0.821313    | 0.0292542 |
| B2RC06               |             | 0.821285    | 0.0292237 |
| A0A0A0MTL5           | SKP2        | 0.821083    | 0.0290055 |
| Q15796               | SMAD2       | 0.821053    | 0.0289726 |
| Q58A45               | PAN3        | 0.820882    | 0.0287896 |
| Q9P021               | CRIP1       | 0.820489    | 0.0283711 |
| Q5TF21               | SOGA3       | 0.820276    | 0.0281474 |
| O14777               | NDC80       | 0.82        | 0.0278582 |
| Q6PIJ6               | FBXO38      | 0.819168    | 0.0270029 |
| Q2PPJ7               | RALGAPA2    | 0.819055    | 0.0268886 |
| Q96AP0               | ACD         | 0.818949    | 0.0267816 |
| Q9NYZ3               | GTSE1       | 0.818905    | 0.0267374 |
| D3DR40               | C10orf4     | 0.818613    | 0.0264448 |
| A0A024R7K9           | SSBP4       | 0.818584    | 0.0264155 |
| Q17RV3               | LRRK2       | 0.818522    | 0.0263537 |
| Q9Y654               | CBX1        | 0.818489    | 0.0263212 |
| X6REH9               | UBE2W       | 0.818475    | 0.0263068 |
| Q9UHB7               | AFF4        | 0.818426    | 0.0262582 |
| P55085               | F2RL1       | 0.817869    | 0.0257113 |
| Q9H000               | MKRN2       | 0.817857    | 0.0256993 |
| H3BND9               | PCBP2       | 0.817793    | 0.0256369 |
| B3KW05               |             | 0.817621    | 0.0254703 |
| H0Y9P0               | RACK1       | 0.817121    | 0.0249902 |
| Q9NWM3               | CUEDC1      | 0.817013    | 0.0248879 |
| A7LNJ1               | SLC20A1     | 0.816189    | 0.0241167 |
| A8K2A1               | hCG_2030297 | 0.815812    | 0.0237709 |
| A0A023T6R1           | FLJ10292    | 0.815526    | 0.0235107 |
| Q9UMX1               | SUFU        | 0.815081    | 0.023111  |
| Q562Z4               | ACT         | 0.814558    | 0.022649  |
| O75787               | ATP6AP2     | 0.813953    | 0.0221243 |
| P33897               | ABCD1       | 0.813389    | 0.0216437 |
| Q5ZEY3               | GAPD        | 0.813216    | 0.0214979 |
| Q9UBN6               | TNFRSF10D   | 0.813075    | 0.0213804 |
| B3KPL2               | PHF15       | 0.812727    | 0.0210913 |
| Q13393               | PLD1        | 0.812444    | 0.0208588 |
| Q96CG8               | CTHR1       | 0.812399    | 0.020822  |
| Q15417               | CNN3        | 0.812383    | 0.0208084 |

(continued on next page)

supplementary table3 (continued)

| Uniprot<br>Accession | Gene Symol | Fold Change | P value   |
|----------------------|------------|-------------|-----------|
| E5RJF8               | CETN3      | 0.811975    | 0.0204776 |
| Q86YQ8               | CPNE8      | 0.811881    | 0.0204024 |
| Q9UKK3               | PARP4      | 0.811556    | 0.0201423 |
| Q12834               | CDC20      | 0.811224    | 0.0198808 |
| J3KP02               | LEKR1      | 0.811047    | 0.0197414 |
| H3BTB6               | CMC2       | 0.811038    | 0.019735  |
| Q53FS1               |            | 0.810614    | 0.019406  |
| P84022               | SMAD3      | 0.810362    | 0.0192126 |
| Q8WUP2               | FBLIM1     | 0.810261    | 0.0191356 |
| M0QY77               | KXD1       | 0.810212    | 0.0190986 |
| Q9H3U5               | MFSO1      | 0.809991    | 0.0189315 |
| Q7Z406               | MYH14      | 0.809361    | 0.0184613 |
| A0A0A0MR57           | ZNF836     | 0.809339    | 0.0184449 |
| A0A0A0MQR2           | RTFDC1     | 0.808955    | 0.0181641 |
| Q9H3F6               | KCTD10     | 0.808728    | 0.0179992 |
| Q14680               | MELK       | 0.808654    | 0.0179458 |
| J3KN59               | BNIP2      | 0.808247    | 0.0176549 |
| O14757               | CHEK1      | 0.808247    | 0.0176549 |
| P04066               | FUCA1      | 0.808134    | 0.0175747 |
| Q15506               | SPA17      | 0.807903    | 0.0174119 |
| B3KX14               |            | 0.807729    | 0.01729   |
| Q8IZT6               | ASPM       | 0.807551    | 0.0171656 |
| Q9BVS5               | TRMT61B    | 0.807229    | 0.0169435 |
| Q06609               | RAD51      | 0.806773    | 0.0166329 |
| Q9H0I2               | ENKD1      | 0.806061    | 0.0161575 |
| O15240               | VEG        | 0.806011    | 0.0161248 |
| B6ZGT0               | NR111      | 0.805583    | 0.0158454 |
| Q66GS9               | CEP135     | 0.805479    | 0.0157782 |
| X6REB3               | TCF3       | 0.805147    | 0.0155646 |
| B2RBX9               |            | 0.804498    | 0.0151549 |
| P46937               | YAP1       | 0.804444    | 0.0151213 |
| Q96F85               | CNRIP1     | 0.804367    | 0.015073  |
| Q7Z5U6               | WDR53      | 0.80431     | 0.0150379 |
| E5KTI5               | NTHL1      | 0.804143    | 0.0149346 |
| Q5T0D9               | TPRG1L     | 0.804143    | 0.0149346 |
| Q07820               | MCL1       | 0.80387     | 0.0147668 |
| O00506               | STK25      | 0.803648    | 0.0146319 |
| Q9Y248               | GINS2      | 0.803554    | 0.0145749 |
| B3KXW2               |            | 0.803381    | 0.0144707 |
| Q8WUW1               | BRK1       | 0.80315     | 0.0143325 |
| Q08999               | RBL2       | 0.803109    | 0.0143082 |
| A0A0B4J1V9           | HELLS      | 0.803059    | 0.0142788 |
| Q96CX6               | LRRC58     | 0.803016    | 0.0142531 |
| O75794               | CDC123     | 0.803015    | 0.0142526 |
| A8K6X2               |            | 0.802993    | 0.0142392 |
| A0A140VJU4           |            | 0.802643    | 0.0140336 |
| Q9Y275               | TNFSF13B   | 0.80241     | 0.0138976 |
| D3DSQ0               | PCM1       | 0.801668    | 0.0134733 |
| Q63ZY3               | KANK2      | 0.801043    | 0.0131238 |
| A0A024R254           | MAGED1     | 0.800725    | 0.0129492 |
| B4DRE5               |            | 0.800551    | 0.012855  |
| B0QYU2               | CXorf39    | 0.800238    | 0.0126857 |
| A0A024R0B3           | C1orf86    | 0.800189    | 0.0126598 |
| Q14681               | KCTD2      | 0.800182    | 0.0126561 |
| Q9ULV0               | MYO5B      | 0.8         | 0.0125587 |
| P49638               | TTPA       | 0.799807    | 0.0124562 |
| Q9NVP2               | ASF1B      | 0.799801    | 0.0124531 |
| A1A5C5               | RRBP1      | 0.799122    | 0.012099  |
| O14965               | AURKA      | 0.798483    | 0.0117738 |
| Q96GD4               | AURKB      | 0.797798    | 0.0114331 |
| E9PDU6               | CNN3       | 0.797657    | 0.0113643 |
| Q53H80               | AKIRIN2    | 0.79686     | 0.0109806 |

(continued on next page)

supplementary table3 (continued)

| Uniprot<br>Accession | Gene Symol   | Fold Change | P value    |
|----------------------|--------------|-------------|------------|
| AOA0S2Z542           | MAPK13       | 0.796756    | 0.0109315  |
| O60437               | PPL          | 0.796233    | 0.010687   |
| Q16763               | UBE2S        | 0.796046    | 0.0106006  |
| Q86TN4               | TRPT1        | 0.795807    | 0.0104912  |
| AOA0J9YW36           | STMN3        | 0.794847    | 0.0100616  |
| P14635               | CCNB1        | 0.794326    | 0.00983477 |
| AOA024RCM2           | ZNF184       | 0.794296    | 0.00982157 |
| Q15036               | SNX17        | 0.794231    | 0.00979368 |
| Q9H0U9               | TSPYL1       | 0.794227    | 0.00979214 |
| AOA024RCW8           | DOM3Z        | 0.794221    | 0.00978935 |
| O95382               | MAP3K6       | 0.793537    | 0.00949946 |
| Q8NFX5               | TNIP2        | 0.793478    | 0.009475   |
| AOA1B0GTQ2           | RAB34        | 0.79249     | 0.00907015 |
| Q8TDM6               | DLG5         | 0.792275    | 0.00898389 |
| AOA126LAV9           | U14          | 0.792079    | 0.00890625 |
| P62306               | SNRPF        | 0.791084    | 0.00851984 |
| Q0P6H9               | TMEM62       | 0.790766    | 0.00839958 |
| E5RFX8               | CCNC         | 0.790756    | 0.00839585 |
| AOA024R9Y6           | GNL3L        | 0.790744    | 0.00839142 |
| P51530               | DNA2         | 0.790674    | 0.00836479 |
| A6ZKI3               | FAM127A      | 0.790441    | 0.00827808 |
| Q9UBU8               | MORF4L1      | 0.789802    | 0.00804371 |
| E9PK91               | BCLAF1       | 0.789517    | 0.00794107 |
| B3KQF4               |              | 0.788826    | 0.00769656 |
| AOA024QZ47           | APPBP2       | 0.788655    | 0.00763725 |
| AOA024R3H2           | SORL1        | 0.787989    | 0.00740957 |
| A4PIV7               | SYT-SSX1     | 0.787705    | 0.00731424 |
| Q5BJF6               | ODF2         | 0.787698    | 0.00731205 |
| P41134               | ID1          | 0.78756     | 0.00726596 |
| B4DZC9               |              | 0.787081    | 0.00710876 |
| B4DLY2               |              | 0.786453    | 0.00690694 |
| Q8TEY7               | USP33        | 0.786042    | 0.00677749 |
| Q15834               | CCDC85B      | 0.785714    | 0.00667578 |
| AOA024QZ09           | OTUD5        | 0.785575    | 0.006633   |
| Q7Z7G8               | VPS13B       | 0.784857    | 0.00641611 |
| AOA024R466           | ITM2C        | 0.78439     | 0.00627854 |
| B3KMS0               |              | 0.784314    | 0.00625623 |
| Q9NW38               | FANCL        | 0.784141    | 0.00620609 |
| Q7Z5H3               | ARHGAP22     | 0.784034    | 0.00617512 |
| Q8N3Z6               | ZCCHC7       | 0.783691    | 0.00607719 |
| Q9HBU6               | ETNK1        | 0.783317    | 0.00597192 |
| Q86XQ3               | CATSPER3     | 0.783103    | 0.00591231 |
| AOA024R9A9           | UBE2T        | 0.78297     | 0.00587548 |
| A8K9Y9               |              | 0.782912    | 0.00585953 |
| A1XBS5               | FAM92A1      | 0.782609    | 0.00577665 |
| Q9NVF7               | FBXO28       | 0.78253     | 0.00575521 |
| Q8NA72               | POC5         | 0.782218    | 0.00567135 |
| A8K5A6               |              | 0.781996    | 0.00561226 |
| A8K4B4               |              | 0.78128     | 0.00542551 |
| Q9UBG0               | MRC2         | 0.781136    | 0.00538852 |
| D3DRP5               | C9orf19      | 0.780968    | 0.00534586 |
| H0YH20               | BCKDHA       | 0.780859    | 0.00531818 |
| AOA024RDZ1           | RP11-484I6.3 | 0.780072    | 0.00512264 |
| Q8IXW5               | RPAP2        | 0.779947    | 0.00509215 |
| Q9H4I9               | SMDT1        | 0.779177    | 0.00490801 |
| AOA024RDQ5           | GTF3A        | 0.77907     | 0.00488278 |
| O00762               | UBE2C        | 0.778751    | 0.00480866 |
| Q96EI5               | TCEAL4       | 0.778605    | 0.00477483 |
| Q9NXJ5               | PGPEP1       | 0.778257    | 0.00469556 |
| Q9HC98               | NEK6         | 0.777778    | 0.0045881  |
| B2RFG2               |              | 0.777681    | 0.00456665 |
| Q96LW4               | PRIMPOL      | 0.777388    | 0.00450238 |

(continued on next page)

supplementary table3 (continued)

| Uniprot<br>Accession | Gene Symol  | Fold Change | P value     |
|----------------------|-------------|-------------|-------------|
| Q8WXI2               | CNKSR2      | 0.776971    | 0.00441212  |
| Q8WUY9               | DEPDC1B     | 0.776699    | 0.00435415  |
| Q8NBT0               | POC1A       | 0.776449    | 0.00430144  |
| A0A024R110           | DAZAP2      | 0.775879    | 0.00418348  |
| E7EVH7               |             | 0.775424    | 0.00409117  |
| P22413               | ENPP1       | 0.775233    | 0.00405312  |
| Q8IW19               | APLF        | 0.774926    | 0.00399238  |
| P51610               | HCFC1       | 0.774561    | 0.00392138  |
| Q16666               | IFI16       | 0.773143    | 0.00365567  |
| A0A024R6E4           | C14orf118   | 0.772201    | 0.00348795  |
| P04731               | MT1A        | 0.771626    | 0.00338911  |
| Q9H6K5               | PRR36       | 0.771429    | 0.00335567  |
| P32241               | VIPR1       | 0.771231    | 0.00332246  |
| B2R636               |             | 0.769442    | 0.00303552  |
| A2RU78               | KIF3C       | 0.769369    | 0.00302436  |
| B7Z7L8               |             | 0.768194    | 0.00284856  |
| P12109               | COL6A1      | 0.767007    | 0.00268024  |
| Q9NSB8               | HOMER2      | 0.765796    | 0.00251775  |
| Q6NTE8               | C5orf45     | 0.764205    | 0.00231751  |
| A0A024R6A0           | ARG2        | 0.764123    | 0.00230763  |
| Q06481               | APLP2       | 0.763726    | 0.00226008  |
| Q8IV53               | DENND1C     | 0.763492    | 0.00223255  |
| A0A024R1E6           | PRAME       | 0.763184    | 0.0021967   |
| A0A024R3G4           | SC5DL       | 0.763063    | 0.00218276  |
| F8WEC0               | MMADHC      | 0.762679    | 0.00213906  |
| A8K9A5               |             | 0.762611    | 0.00213138  |
| A7BI36               | RRBP1       | 0.762032    | 0.0020671   |
| B3KSP9               |             | 0.761553    | 0.00201521  |
| P14854               | COX6B1      | 0.761324    | 0.00199087  |
| A0A024RAP2           | HMGCR       | 0.76115     | 0.00197249  |
| B7Z1P2               | FBXO44      | 0.760923    | 0.00194885  |
| Q9H467               | CUEDC2      | 0.760261    | 0.00188115  |
| Q460N5               | PARP14      | 0.760138    | 0.0018688   |
| Q9Y6B2               | EID1        | 0.759746    | 0.00182996  |
| A7E2A6               | TENC1       | 0.759473    | 0.0018033   |
| A8K3H2               |             | 0.759296    | 0.00178619  |
| B2R6E2               |             | 0.757119    | 0.0015877   |
| A0A024R5Z0           | TCF12       | 0.756951    | 0.00157321  |
| Q3KRA9               | ALKBH6      | 0.75653     | 0.00153749  |
| B3KY59               |             | 0.756288    | 0.00151729  |
| Q9H8M1               | COQ10B      | 0.756098    | 0.00150156  |
| Q9HCD6               | TANC2       | 0.755013    | 0.00141471  |
| P01583               | IL1A        | 0.754275    | 0.00135825  |
| A9QQ22               | WASH        | 0.753833    | 0.00132536  |
| Q86U70               | LDB1        | 0.753052    | 0.00126902  |
| A0A090N8N0           | LOC340312   | 0.751687    | 0.00117576  |
| E9PSH4               | MAF1        | 0.751618    | 0.00117123  |
| Q9BXL8               | CDCA4       | 0.751332    | 0.00115255  |
| A0A0S2Z3S5           | GNAS        | 0.751318    | 0.00115164  |
| P27469               | G0S2        | 0.747687    | 0.00093691  |
| P51636               | CAV2        | 0.746933    | 0.000897104 |
| O95067               | CCNB2       | 0.745698    | 0.000835268 |
| B2R6V2               |             | 0.743483    | 0.000733904 |
| Q15773               | MLF2        | 0.741379    | 0.000648104 |
| P23458               | JAK1        | 0.740775    | 0.000625194 |
| O15031               | PLXNB2      | 0.738899    | 0.000558679 |
| B2RBI4               |             | 0.738703    | 0.000552133 |
| B7Z8Z2               |             | 0.737619    | 0.000517084 |
| P49796               | RGS3        | 0.737073    | 0.000500184 |
| A8K9U1               |             | 0.736554    | 0.000484623 |
| Q9P2N7               | KLHL13      | 0.736395    | 0.00047992  |
| A0A024RC10           | hCG_1740677 | 0.735523    | 0.000454972 |

(continued on next page)

supplementary table3 (continued)

| Uniprot<br>Accession | Gene Symol  | Fold Change | P value     |
|----------------------|-------------|-------------|-------------|
| Q9Y5W7               | SNX14       | 0.732997    | 0.000389213 |
| Q8TB96               | ITFG1       | 0.732663    | 0.000381195 |
| Q96ST8               | CEP89       | 0.731853    | 0.000362375 |
| Q9BR77               | CCDC77      | 0.73166     | 0.000358021 |
| O95273               | CCNDBP1     | 0.72931     | 0.000308685 |
| P58335               | ANTXR2      | 0.726968    | 0.000265775 |
| P48307               | TFPI2       | 0.726399    | 0.000256202 |
| A0A024R7M1           | RFXANK      | 0.725604    | 0.000243372 |
| A0A087WVP1           | FAT1        | 0.725581    | 0.000243018 |
| E9PR30               | FAU         | 0.725379    | 0.000239847 |
| B6CAV5               | KIR2DS5     | 0.725256    | 0.000237943 |
| Q2NL68               | PROSER3     | 0.725151    | 0.000236331 |
| B2R7K0               |             | 0.725049    | 0.000234765 |
| O75496               | GMNN        | 0.724878    | 0.000232172 |
| A0A024R416           | USP37       | 0.724167    | 0.000221666 |
| Q9UJJ7               | RPUSD1      | 0.722411    | 0.000197542 |
| Q9NZN4               | EHD2        | 0.722222    | 0.0001951   |
| P60520               | GABARAPL2   | 0.72164     | 0.000187733 |
| A0AUJ2               | PIG58       | 0.720383    | 0.000172707 |
| Q9Y6H1               | CHCHD2      | 0.719807    | 0.000166189 |
| Q9Y2U9               | KLHDC2      | 0.71978     | 0.000165894 |
| Q9BZK3               | NACAP1      | 0.719711    | 0.000165125 |
| D3DR37               | CEP55       | 0.717431    | 0.000141649 |
| A8K2V5               |             | 0.716858    | 0.000136247 |
| A0A024R9B0           | CCNE2       | 0.716769    | 0.000135429 |
| Q0D2I6               | FEZ2        | 0.713656    | 0.000109429 |
| O60673               | REV3L       | 0.70691     | 6.81E-05    |
| Q9NX12               |             | 0.706379    | 6.56E-05    |
| O75386               | TULP3       | 0.705989    | 6.37E-05    |
| P19021               | PAM         | 0.70572     | 6.25E-05    |
| A0A024R1S2           | CDC6        | 0.705187    | 6.02E-05    |
| H7C3I1               | ST13        | 0.704961    | 5.92E-05    |
| O43405               | COCH        | 0.704       | 5.52E-05    |
| B2R4N3               |             | 0.698502    | 3.68E-05    |
| Q9UI14               | RABAC1      | 0.695616    | 2.96E-05    |
| Q8NDG6               | TDRD9       | 0.693738    | 2.57E-05    |
| Q8IY63               | AMOTL1      | 0.691264    | 2.12E-05    |
| Q7Z4F1               | LRP10       | 0.691021    | 2.08E-05    |
| B4DL54               | CHURC1-FNTB | 0.690759    | 2.04E-05    |
| Q9HB72               |             | 0.690323    | 1.97E-05    |
| A0A096LP99           | PRAMEF18    | 0.687589    | 1.59E-05    |
| A0A0U1RQM0           |             | 0.687438    | 1.57E-05    |
| Q8N5Y2               | MSL3        | 0.687057    | 1.52E-05    |
| Q59G84               |             | 0.68617     | 1.42E-05    |
| A0A024R8B0           | ZYG11BL     | 0.685252    | 1.32E-05    |
| P0C7M4               | RHOXF2B     | 0.67611     | 6.24E-06    |
| Q9BS16               | CENPK       | 0.674624    | 5.50E-06    |
| P43360               | MAGEA6      | 0.666667    | 2.77E-06    |
| O14958               | CASQ2       | 0.661801    | 1.79E-06    |
| P41970               | ELK3        | 0.657546    | 1.22E-06    |
| K7ES00               | H3F3B       | 0.652444    | 7.56E-07    |
| Q9POP0               | RNF181      | 0.651351    | 6.81E-07    |
| B3KNH6               |             | 0.648542    | 5.21E-07    |
| Q16466               |             | 0.647702    | 4.80E-07    |
| H7C4W4               | FSTL1       | 0.645051    | 3.71E-07    |
| B7Z4N1               |             | 0.641295    | 2.56E-07    |
| X6R7X0               | TCEANC2     | 0.641148    | 2.52E-07    |
| Q14CZ0               | C16orf72    | 0.640786    | 2.43E-07    |
| B3KQA0               |             | 0.633855    | 1.20E-07    |
| B9EJA8               | MRC1L1      | 0.625811    | 5.11E-08    |
| Q9BV57               | ADI1        | 0.618522    | 2.30E-08    |
| B2RBV5               |             | 0.612873    | 1.21E-08    |

(continued on next page)

**supplementary table3** (continued)

| Uniprot<br>Accession | Gene Symol | Fold Change | P value  |
|----------------------|------------|-------------|----------|
| O15304               | SIVA1      | 0.610169    | 8.84E-09 |
| P84101               | SERF2      | 0.608929    | 7.65E-09 |
| Q6IAP2               | PNMA1      | 0.604874    | 4.73E-09 |
| Q9P2B7               | CFAP97     | 0.597701    | 1.98E-09 |
| B2R6N3               |            | 0.597665    | 1.97E-09 |
| W0S1J7               | Pe7Fe14    | 0.589892    | 7.38E-10 |
| O00767               | SCD        | 0.574675    | 9.68E-11 |
| AOA024R219           | ZA20D2     | 0.569873    | 4.94E-11 |
| Q8N6I1               | EID2       | 0.569444    | 4.65E-11 |
| P43356               | MAGEA2     | 0.562372    | 1.67E-11 |
| Q86WV6               | TMEM173    | 0.550643    | 2.84E-12 |
| AOA024R838           | hCG_20884  | 0.549632    | 2.43E-12 |
| Q96LD1               | SGCZ       | 0.547801    | 1.82E-12 |
| Q9HD64               | XAGE1A     | 0.530159    | 1.00E-13 |
| J3KSZ0               | EIF4A1     | 0.4675      | 3.47E-19 |
| A6NFQ7               | DPRX       | 0.328079    | 7.81E-40 |

Tables S4. The 26 overlapping proteins between USP35-upregulated proteins and shUSP35-downregulated proteins.

**supplementary table4**

Differential expressed proteins by iTARQ coupled LC-MS/MS analysis

| Uniprot Accession | Gene Symol | USP35 VS. EV |            | shUSP35 VS. shNC |            |
|-------------------|------------|--------------|------------|------------------|------------|
|                   |            | Fold Change  | P value    | Fold Change      | P value    |
| Q8NFZ5            | TNIP2      | 2.5133       | 3.0243E-12 | 0.793478         | 0.009475   |
| Q96GD4            | AURKB      | 2.33068      | 1.5852E-10 | 0.797798         | 0.0114331  |
| Q7Z406            | MYH14      | 1.98886      | 2.2395E-07 | 0.809361         | 0.0184613  |
| P84022            | SMAD3      | 1.78599      | 1.3517E-05 | 0.810362         | 0.0192126  |
| Q9NWW7            | C2orf42    | 1.78356      | 1.4177E-05 | 0.827586         | 0.0367438  |
| A0A024R6A0        | ARG2       | 1.74413      | 3.0551E-05 | 0.764123         | 0.00230763 |
| O00506            | STK25      | 1.69651      | 7.6021E-05 | 0.803648         | 0.0146319  |
| Q14681            | KCTD2      | 1.63932      | 0.00022153 | 0.800182         | 0.0126561  |
| A1A5C5            | RRBP1      | 1.62918      | 0.00026694 | 0.799122         | 0.012099   |
| Q08999            | RBL2       | 1.58171      | 0.00063033 | 0.803109         | 0.0143082  |
| H7C311            | ST13       | 1.55764      | 0.00096552 | 0.704961         | 5.9191E-05 |
| Q9UBG0            | MRC2       | 1.54963      | 0.00111111 | 0.781136         | 0.00538852 |
| B0QYU2            | CXorf39    | 1.51111      | 0.00215964 | 0.800238         | 0.0126857  |
| A6NFQ7            | DPRX       | 1.49154      | 0.00300536 | 0.328079         | 7.807E-40  |
| P04066            | FUCA1      | 1.49045      | 0.00306073 | 0.808134         | 0.0175747  |
| Q06481            | APLP2      | 1.4786       | 0.00372882 | 0.763726         | 0.00226008 |
| Q9Y654            | CBX1       | 1.45324      | 0.00565224 | 0.818489         | 0.0263212  |
| A0A0J9YW36        | STMN3      | 1.43563      | 0.00750375 | 0.794847         | 0.0100616  |
| A0A0S2Z455        | SERPINI1   | 1.41735      | 0.0100196  | 0.827521         | 0.0366588  |
| Q15506            | SPA17      | 1.40347      | 0.0124358  | 0.807903         | 0.0174119  |
| Q9NXJ5            | PGPEP1     | 1.39506      | 0.0141533  | 0.778257         | 0.00469556 |
| Q9NWM3            | CUEDC1     | 1.39381      | 0.0144267  | 0.817013         | 0.0248879  |
| P55085            | F2RL1      | 1.3891       | 0.0155013  | 0.817869         | 0.0257113  |
| A0A024R7M1        | RFXANK     | 1.34286      | 0.0307483  | 0.725604         | 0.00024337 |
| A0A024R3H2        | SORL1      | 1.34177      | 0.0312343  | 0.787989         | 0.00740957 |
| D3DS14            | FLJ10357   | 1.33062      | 0.0366218  | 0.822993         | 0.0311232  |

Tables S5. Correlation between expression levels of USP35 and the clinical features.

**Supplementary Table 5**

Correlation between expression levels of **USP35** and the clinical features.

| Clinicopathological parameters | n  | IHC score<br>(Mean ± Standard deviation) | <i>p</i>                      |
|--------------------------------|----|------------------------------------------|-------------------------------|
| Age at diagnosis (years)       |    |                                          | 0.8213 <sup>a</sup>           |
| <65                            | 33 | 4.40±2.35                                |                               |
| ≥65                            | 12 | 4.23±1.92                                |                               |
| Sex                            |    |                                          | 0.2973 <sup>a</sup>           |
| male                           | 24 | 4.13±1.86                                |                               |
| female                         | 13 | 4.90±2.95                                |                               |
| Primary tumor size             |    |                                          | 0.6529 <sup>a</sup>           |
| <5cm                           | 33 | 4.45±2.40                                |                               |
| ≥5cm                           | 12 | 4.10±1.72                                |                               |
| TNM stage                      |    |                                          |                               |
| I                              | 20 | 3.45±1.35                                |                               |
| II                             | 11 | 3.34±2.15                                | <i>P</i> <0.9813 <sup>b</sup> |
| III-IV                         | 14 | 6.45±1.92                                | <i>P</i> <0.0001 <sup>b</sup> |

a. Student t test; b. One-way ANOVA.



Tables S6. Correlation between expression levels of RRBP1 and the clinical features.

**Supplementary Table 6**

Correlation between expression levels of **RRBP1** and the clinical features.

| Clinicopathological parameters | n  | IHC score<br>(Mean ± Standard deviation) | <i>p</i>                      |
|--------------------------------|----|------------------------------------------|-------------------------------|
| Age at diagnosis (years)       |    |                                          | 0.9221 <sup>a</sup>           |
| <65                            | 33 | 5.37±1.51                                |                               |
| ≥65                            | 12 | 5.31±2.37                                |                               |
| Sex                            |    |                                          | 0.3117 <sup>a</sup>           |
| male                           | 32 | 5.20±1.63                                |                               |
| female                         | 13 | 5.80±2.07                                |                               |
| Primary tumor size             |    |                                          | 0.2933 <sup>a</sup>           |
| <5cm                           | 33 | 5.52±1.59                                |                               |
| ≥5cm                           | 12 | 4.90±2.14                                |                               |
| TNM stage                      |    |                                          |                               |
| I                              | 20 | 4.97±1.16                                |                               |
| II                             | 11 | 4.90±1.96                                | <i>P</i> <0.9919 <sup>b</sup> |
| III-IV                         | 14 | 6.50±1.87                                | <i>P</i> <0.0188 <sup>b</sup> |

a. Student t test; b. One-way ANOVA.
